# Supplementary material
Source: PubMed Central journal article supplement (PMC7706324)
Supplement: NIHMS1644002-supplement-Supplemental_table_S1.pdf [file NIHMS1644002-supplement-Supplemental_table_S1.pdf]

**Genes Differentially Regulated by 2-Fold or higher in Male WT vs. Female WT Comparison:**

| Probe Set ID | Femal e |         | Male    |         | Male    |         | Male    |         | p-value                          | p-value                      | p-value                        | p-value                        | Gene          | Description                                                           | GB        | Entrez Id | Cytoband |
|--------------|---------|---------|---------|---------|---------|---------|---------|---------|----------------------------------|------------------------------|--------------------------------|--------------------------------|---------------|-----------------------------------------------------------------------|-----------|-----------|----------|
|              | Cd82-/- | Cd82+/+ | Cd82-/- | Cd82+/+ | Cd82-/- | Cd82+/+ | Cd82-/- | Cd82+/+ |                                  |                              |                                |                                |               |                                                                       |           |           |          |
|              | signal  | signal  | signal  | signal  | Ratio   | Ratio   | Ratio   | Ratio   | Female Cd82+/+ vs Female Cd82-/- | Male Cd82+/+ vs Male Cd82-/- | Female Cd82+/+ vs Male Cd82-/- | Male Cd82+/+ vs Female Cd82-/- |               |                                                                       |           |           |          |
| 1457666_s_at | 3       | 1       | 1       | 3269    | 2884.4  | 2.2985  | 0.0004  | 0.5564  | 2E-13                            | 0.1337                       | 7E-11                          | 0.287                          | Ifi202b       | interferon activated gene 202B                                        | AV229143  | 26388     | 1 H3     |
| 1421551_s_at | 5       | 4       | 3       | 3224    | 845.2   | 1.2393  | 0.0008  | 0.5317  | 9E-09                            | 0.6723                       | 3E-10                          | 0.1814                         | Ifi202b       | interferon activated gene 202B                                        | NM_011940 | 26388     | 1 H3     |
| 1426438_at   | 3       | 4       | 1928    | 2573    | 597.91  | 0.7865  | 0.7493  | 569.62  | 8E-09                            | 0.6772                       | 0.0719                         | 5E-08                          | Ddx3y         | DEAD (Asp-Glu-Ala-Asp) box polypeptide 3, Y-linked                    | AA210261  | 26900     | Y A1     |
| 1452077_at   | 5       | 3       | 1228    | 1653    | 488.7   | 1.4532  | 0.7426  | 249.73  | 1E-07                            | 0.5858                       | 0.0983                         | 5E-07                          | Ddx3y         | DEAD (Asp-Glu-Ala-Asp) box polypeptide 3, Y-linked                    | AA210261  | 26900     | Y A1     |
| 1417210_at   | 5       | 3       | 1083    | 1072    | 399.38  | 2.0054  | 1.011   | 201.34  | 1E-06                            | 0.4049                       | 0.731                          | 2E-06                          | Eif2s3y       | eukaryotic translation initiation factor 2, subunit 3, structural ger | NM_012011 | 26908     | Y A1     |
| 1424903_at   | 6       | 3       | 325     | 369     | 137.76  | 2.2151  | 0.8804  | 54.752  | 4E-07                            | 0.3192                       | 0.0775                         | 5E-05                          | Jarid1d       | jumonji, AT rich interactive domain 1D (Rbp2 like)                    | AF127244  | 20592     | Y A1     |
| 1426439_at   | 16      | 8       | 670     | 1098    | 132.79  | 1.942   | 0.6099  | 41.709  | 4E-06                            | 0.2205                       | 0.0265                         | 7E-09                          | Ddx3y         | DEAD (Asp-Glu-Ala-Asp) box polypeptide 3, Y-linked                    | AA210261  | 26900     | Y A1     |
| 1426598_at   | 10      | 4       | 243     | 304     | 79.421  | 2.5006  | 0.7998  | 25.401  | 5E-06                            | 0.2296                       | 0.0331                         | 7E-05                          | Uty           | ubiquitously transcribed tetratricopeptide repeat gene, Y chrom       | BB742957  | 22290     | Y A1     |
| 1419728_at   | 5       | 5       | 7       | 231     | 49.786  | 1.1236  | 0.0302  | 1.3402  | 3E-05                            | 0.8662                       | 3E-06                          | 0.6036                         | Cxcl5         | chemokine (C-X-C motif) ligand 5                                      | NM_009141 | 20311     | 5 E1     |
| 1442140_at   | 46      | 43      | 92      | 1855    | 42.915  | 1.0673  | 0.0495  | 1.9918  | 2E-05                            | 0.9125                       | 2E-10                          | 0.0676                         | Tnn           | tenascin N                                                            | AI591634  | 329278    | 1 H2.1   |
| 1419332_at   | 4       | 5       | 7       | 130     | 26.448  | 0.8547  | 0.0558  | 1.7274  | 2E-05                            | 0.7995                       | 0.0001                         | 0.3935                         | Egfl6         | EGF-like-domain, multiple 6                                           | NM_019397 | 54156     | X F5     |
| 1433716_x_at | 13      | 6       | 11      | 112     | 17.795  | 1.9893  | 0.0998  | 0.8927  | 4E-06                            | 0.1654                       | 0.0001                         | 0.821                          | Gfra2         | glial cell line derived neurotrophic factor family receptor alpha 2   | BB284482  | 14586     | 14 D3-E1 |
| 1422247_a_at | 9       | 16      | 207     | 238     | 15.263  | 0.5647  | 0.8689  | 23.486  | 2E-08                            | 0.3835                       | 0.0376                         | 0.0002                         | Uty           | ubiquitously transcribed tetratricopeptide repeat gene, Y chrom       | NM_009484 | 22290     | Y A1     |
| 1456935_at   | 9       | 7       | 7       | 102     | 14.961  | 1.2626  | 0.0649  | 0.7695  | 0.0004                           | 0.7065                       | 0.0001                         | 0.6402                         | Al606473      | expressed sequence Al606473                                           | Al606473  |           | 99686    |
| 1457945_at   | 21      | 25      | 365     | 350     | 13.876  | 0.8164  | 1.0408  | 17.689  | 3E-08                            | 0.4352                       | 0.596                          | 4E-08                          |               |                                                                       | BM121819  |           |          |
| 1427300_at   | 68      | 38      | 37      | 514     | 13.542  | 1.7899  | 0.0729  | 0.5517  | 2E-07                            | 0.0573                       | 4E-08                          | 0.0362                         | Lhx8          | LIM homeobox protein 8                                                | D49658    | 16875     | 3 H3-H4  |
| 1438946_at   | 8       | 14      | 14      | 174     | 12.6    | 0.599   | 0.0827  | 1.7401  | 0.0007                           | 0.5226                       | 4E-05                          | 0.4096                         | Pdgfra        | platelet derived growth factor receptor, alpha polypeptide            | BB221015  | 18595     | 5 C3.3   |
| 1460248_at   | 39      | 39      | 51      | 488     | 12.469  | 1.0055  | 0.1045  | 1.2958  | 2E-08                            | 0.9806                       | 5E-10                          | 0.1899                         | Cpxm2         | carboxypeptidase X 2 (M14 family)                                     | AF017639  | 55987     | 7 F4     |
| 1421917_at   | 69      | 112     | 121     | 1293    | 11.587  | 0.6186  | 0.0936  | 1.7527  | 7E-10                            | 0.0164                       | 6E-10                          | 0.0057                         | Pdgfra        | platelet derived growth factor receptor, alpha polypeptide            | AW537708  | 18595     | 5 C3.3   |
| 1449340_at   | 47      | 36      | 31      | 334     | 9.3726  | 1.3274  | 0.0919  | 0.6491  | 4E-07                            | 0.1462                       | 1E-05                          | 0.1765                         | Sostdc1       | sclerostin domain containing 1                                        | BC021458  | 66042     | 12 B2    |
| 1431418_at   | 5       | 11      | 87      | 101     | 9.2042  | 0.4853  | 0.8652  | 16.409  | 0.0007                           | 0.2768                       | 0.2967                         | 6E-05                          | C030026M15Rik | RIKEN cDNA C030026M15 gene                                            | AK021104  | 77378     |          |
| 1421058_at   | 13      | 22      | 11      | 184     | 8.3896  | 0.5882  | 0.0609  | 0.8692  | 2E-07                            | 0.2169                       | 6E-06                          | 0.7693                         | Adh7          | alcohol dehydrogenase 7 (class IV), mu or sigma polypeptide           | NM_009626 | 11529     | 3 G3     |
| 1435227_at   | 69      | 37      | 58      | 251     | 6.8632  | 1.8781  | 0.2324  | 0.8493  | 9E-05                            | 0.0598                       | 2E-09                          | 0.0938                         | Bcl11b        | B-cell leukemia/lymphoma 11B                                          | BM117007  | 58208     | 12 F1    |
| 1426278_at   | 191     | 200     | 115     | 1337    | 6.6789  | 0.9537  | 0.0864  | 0.6048  | 9E-10                            | 0.5953                       | 2E-08                          | 0.0097                         | Ifi27         | interferon, alpha-inducible protein 27                                | AY090098  | 76933     | 12 E     |
| 1416855_at   | 305     | 199     | 219     | 1310    | 6.5691  | 1.5289  | 0.167   | 0.7176  | 7E-07                            | 0.1131                       | 7E-06                          | 0.2465                         | Gas1          | growth arrest specific 1                                              | BB550400  | 14451     | 13 B3-C2 |
| 1451567_a_at | 116     | 182     | 82      | 1184    | 6.507   | 0.6393  | 0.0689  | 0.7011  | 3E-07                            | 0.0131                       | 3E-10                          | 0.0121                         | Ifi203        | interferon activated gene 203                                         | BC008167  | 15950     | 1 H3     |
| 1457429_s_at | 42      | 26      | 29      | 155     | 6.0147  | 1.6334  | 0.184   | 0.6775  | 0.0003                           | 0.217                        | 0.0001                         | 0.265                          | Gm106         | gene model 106, (NCBI)                                                | BB549174  | 226866    | 1 A3     |
| 1419000_at   | 20      | 18      | 30      | 109     | 5.9328  | 1.0882  | 0.2748  | 1.4983  | 1E-07                            | 0.8285                       | 7E-07                          | 0.2699                         | Cpxm2         | carboxypeptidase X 2 (M14 family)                                     | AF017639  | 55987     | 7 F4     |
| 1417411_at   | 34      | 18      | 22      | 104     | 5.8382  | 1.8986  | 0.2074  | 0.6377  | 0.0031                           | 0.2562                       | 0.0002                         | 0.2682                         | Nap115        | nucleosome assembly protein 1-like 5                                  | NM_021432 | 58243     | 6 C1     |
| 1417986_at   | 47      | 17      | 25      | 100     | 5.8276  | 2.7173  | 0.2519  | 0.5402  | 0.0003                           | 0.0416                       | 1E-05                          | 0.0799                         | Nrarp         | Notch-regulated ankyrin repeat protein                                | BI696369  | 67122     | 2 A3     |
| 1429947_a_at | 81      | 70      | 29      | 390     | 5.6017  | 1.163   | 0.0736  | 0.3547  | 6E-05                            | 0.5703                       | 7E-05                          | 0.0295                         | Zbp1          | Z-DNA binding protein 1                                               | AK008179  | 58203     | 2 H3     |
| 1434848_at   | 38      | 34      | 31      | 177     | 5.2204  | 1.133   | 0.1745  | 0.8042  | 1E-05                            | 0.562                        | 1E-08                          | 0.1186                         |               |                                                                       | BB259283  |           |          |
| 1442153_at   | 35      | 33      | 170     | 170     | 5.1022  | 1.0521  | 1.0023  | 4.8606  | 0.0002                           | 0.8651                       | 0.976                          | 5E-08                          |               |                                                                       | BB206087  |           |          |
| 1448291_at   | 56      | 102     | 86      | 519     | 5.1011  | 0.5539  | 0.1666  | 1.5346  | 7E-07                            | 0.0368                       | 2E-09                          | 0.0588                         | Mmp9          | matrix metalloproteinase 9                                            | NM_013599 | 17395     | 2 H1-H2  |
| 1450110_at   | 85      | 82      | 75      | 414     | 5.0212  | 1.0367  | 0.1812  | 0.8777  | 5E-09                            | 0.6413                       | 3E-06                          | 0.4949                         | Adh7          | alcohol dehydrogenase 7 (class IV), mu or sigma polypeptide           | NM_009626 | 11529     | 3 G3     |
| 1451648_a_at | 99      | 81      | 69      | 403     | 4.9514  | 1.2205  | 0.1711  | 0.6943  | 4E-06                            | 0.3157                       | 1E-09                          | 0.0114                         | Folr2         | folate receptor 2 (fetal)                                             | BC022108  | 14276     | 7 E3     |
| 1421916_at   | 49      | 66      | 58      | 317     | 4.8337  | 0.7408  | 0.1817  | 1.1857  | 7E-08                            | 0.0852                       | 4E-09                          | 0.2559                         | Pdgfra        | platelet derived growth factor receptor, alpha polypeptide            | AW537708  | 18595     | 5 C3.3   |
| 1422317_a_at | 919     | 2017    | 1707    | 9559    | 4.7388  | 0.4555  | 0.1786  | 1.8586  | 4E-09                            | 4E-05                        | 6E-14                          | 1E-05                          | Il1rl1        | interleukin 1 receptor-like 1                                         | NM_010743 | 17082     | 1 B      |
| 1439549_at   | 88      | 42      | 62      | 198     | 4.7166  | 2.1108  | 0.3152  | 0.7044  | 5E-05                            | 0.015                        | 2E-06                          | 0.0562                         | Prrg3         | proline rich Gla (G-carboxyglutamic acid) 3 (transmembrane)           | BB164509  | 208748    | X A7.3   |
| 1416371_at   | 217     | 162     | 162     | 750     | 4.6418  | 1.3449  | 0.2165  | 0.7473  | 2E-07                            | 0.1078                       | 4E-09                          | 0.0619                         | Apod          | apolipoprotein D                                                      | NM_007470 | 11815     | 16 B2    |
| 1424807_at   | 372     | 285     | 342     | 1304    | 4.5776  | 1.3064  | 0.2624  | 0.9193  | 4E-10                            | 0.0056                       | 1E-07                          | 0.4664                         | Lama4         | laminin, alpha 4                                                      | BB053010  | 16775     | 10 B1    |
| 1418536_at   | 54      | 44      | 27      | 197     | 4.4362  | 1.2083  | 0.1381  | 0.5072  | 1E-05                            | 0.365                        | 1E-04                          | 0.0658                         | H2-Q7         | histocompatibility 2, Q region locus 7                                | M29881    | 15018     | 17 B1    |
| 1460661_at   | 76      | 118     | 111     | 521     | 4.4361  | 0.6479  | 0.2128  | 1.4569  | 5E-08                            | 0.0876                       | 2E-09                          | 0.0921                         | S1pr3         | sphingosine-1-phosphate receptor 3                                    | NM_010101 | 13610     | 13 B1    |
| 1430310_at   | 8       | 34      | 23      | 148     | 4.381   | 0.2372  | 0.1572  | 2.9034  | 0.0009                           | 0.0321                       | 2E-05                          | 0.0571                         | Tspan11       | tetraspanin 11                                                        | BB535262  | 68498     | 6 F3     |
| 1460250_at   | 11      | 37      | 15      | 160     | 4.3074  | 0.2959  | 0.093   | 1.3539  | 0.0001                           | 0.0161                       | 0.0006                         | 0.6103                         | Sostdc1       | sclerostin domain containing 1                                        | BC021458  | 66042     | 12 B2    |
| 1438055_at   | 66      | 37      | 60      | 157     | 4.2501  | 1.7802  | 0.3853  | 0.9198  | 4E-06                            | 0.0107                       | 2E-07                          | 0.5017                         | Rarres1       | retinoic acid receptor responder (tazarotene induced) 1               | BB035017  | 109222    | 3 E1     |
| 1450339_a_at | 70      | 55      | 65      | 233     | 4.2469  | 1.2698  | 0.2797  | 0.9354  | 5E-06                            | 0.1744                       | 3E-07                          | 0.5793                         | Bcl11b        | B-cell leukemia/lymphoma 11B                                          | NM_021399 | 58208     | 12 F1    |
| 1416298_at   | 110     | 144     | 147     | 604     | 4.1799  | 0.76    | 0.243   | 1.3368  | 4E-09                            | 0.1135                       | 4E-06                          | 0.1845                         | Mmp9          | matrix metalloproteinase 9                                            | NM_013599 | 17395     | 2 H1-H2  |
| 1418796_at   | 52      | 37      | 36      | 154     | 4.1217  | 1.3931  | 0.2362  | 0.6989  | 0.0031                           | 0.3783                       | 0.0029                         | 0.3586                         | Clec11a       | C-type lectin domain family 11, member a                              | NM_009131 | 20256     | 7 B3-B5  |
| 1448494_at   | 223     | 179     | 191     | 733     | 4.1038  | 1.2465  | 0.2606  | 0.8581  | 3E-08                            | 0.1107                       | 2E-08                          | 0.2344                         | Gas1          | growth arrest specific 1                                              | BB550400  | 14451     | 13 B3-C2 |
| 1417985_at   | 90      | 58      | 74      | 229     | 3.9726  | 1.5559  | 0.3242  | 0.8278  | 6E-09                            | 0.0037                       | 2E-09                          | 0.0927                         | Nrarp         | Notch-regulated ankyrin repeat protein                                | BI696369  | 67122     | 2 A3     |
| 1448601_s_at | 202     | 144     | 151     | 573     | 3.9704  | 1.3968  | 0.2639  | 0.75    | 5E-08                            | 0.024                        | 2E-08                          | 0.0335                         | Msx1          | homeobox, msh-like 1                                                  | BC016426  | 17701     | 5 B3     |
| 1427746_x_at | 324     | 340     | 218     | 1347    | 3.964   | 0.9531  | 0.1618  | 0.673   | 9E-06                            | 0.691                        | 1E-07                          | 0.0031                         | H2-K1         | histocompatibility 2, K1, K region                                    | S70184    | 14972     | 17 B1    |
| 1452966_at   | 37      | 27      | 29      | 108     | 3.9524  | 1.3622  | 0.2725  | 0.7907  | 1E-05                            | 0.0719                       | 2E-05                          | 0.1914                         | Bcl11b        | B-cell leukemia/lymphoma 11B                                          | AK020296  | 58208     | 12 F1    |
| 1435264_at   | 148     | 150     | 136     | 593     | 3.9511  | 0.9882  | 0.2289  | 0.9153  | 3E-08                            | 0.9014                       | 7E-12                          | 0.1734                         | Emilin2       | elastin microfibril interfacar 2                                      | BB811788  | 246707    | 17 E1.3  |

Table S1 - M vs F (WT)

| Probe Set ID | Femal e Cd82-/- | Femal e Cd82+/- | Male Cd82-/-    | Male Cd82+/-    | Male Cd82+/- | Male Cd82+/- | Male Cd82+/- | p-value Male Cd82+/- | p-value Female Cd82+/- | p-value Male Cd82+/- | p-value Female Cd82+/- | Gene   | Description   | GB                                                              | Entrez Id | Cytoband       |
|--------------|-----------------|-----------------|-----------------|-----------------|--------------|--------------|--------------|----------------------|------------------------|----------------------|------------------------|--------|---------------|-----------------------------------------------------------------|-----------|----------------|
|              | averag e signal | averag e signal | averag e signal | averag e signal | + Ratio      | + Ratio      | + Ratio      | + vs Female Cd82+/-  | + vs Female Cd82+/-    | + vs Male Cd82+/-    | + vs Male Cd82+/-      |        |               |                                                                 |           |                |
| 1418317_at   | 50              | 41              | 40              | 162             | 3.9443       | 1.2042       | 0.2472       | 0.8098               | 5E-05                  | 0.3918               | 2E-07                  | 0.1457 | Lhx2          | LIM homeobox protein 2                                          | NM_010710 | 16870 2 B      |
| 1419209_at   | 50              | 67              | 51              | 264             | 3.916        | 0.7416       | 0.1944       | 1.0266               | 2E-07                  | 0.0022               | 1E-07                  | 0.8072 | Cxcl1         | chemokine (C-X-C motif) ligand 1                                | NM_008176 | 14825 5 E-F    |
| 1448789_at   | 251             | 441             | 412             | 1713            | 3.8836       | 0.5686       | 0.2406       | 1.6434               | 2E-08                  | 0.0008               | 6E-10                  | 0.0005 | Aldh1a3       | aldehyde dehydrogenase family 1, subfamily A3                   | AF253409  | 56847 7 C      |
| 1448326_a_at | 407             | 934             | 606             | 3602            | 3.8573       | 0.4354       | 0.1683       | 1.4906               | 3E-06                  | 7E-05                | 3E-07                  | 0.0184 | Crabp1        | cellular retinoic acid binding protein I                        | NM_013496 | 12903 9 A5.3   |
| 1437056_x_at | 885             | 931             | 924             | 3543            | 3.8059       | 0.951        | 0.2607       | 1.0434               | 2E-08                  | 0.6206               | 5E-10                  | 0.6207 | Crispld2      | cysteine-rich secretory protein LCCL domain containing 2        | BB558800  | 78892 8 E1     |
| 1441743_at   | 194             | 99              | 116             | 374             | 3.7872       | 1.9664       | 0.3091       | 0.5953               | 9E-07                  | 0.0034               | 2E-07                  | 0.0063 | Pax3          | paired box gene 3                                               | BB759978  | 18505 1 C4     |
| 1450506_at   | 306             | 251             | 222             | 944             | 3.76         | 1.2193       | 0.2354       | 0.7259               | 4E-08                  | 0.0946               | 2E-09                  | 0.0079 | Lmo7          | LIM domain only 7                                               | BM231903  | 380928 14 E2.3 |
| 1436094_at   | 100             | 49              | 47              | 184             | 3.759        | 2.0307       | 0.2565       | 0.4748               | 0.0001                 | 0.009                | 0.0004                 | 0.0189 | Vgf           | VEGF nerve growth factor inducible                              | BF458396  | 381677 5 G2    |
| 1460458_at   | 195             | 238             | 248             | 891             | 3.7455       | 0.8207       | 0.2783       | 1.2702               | 2E-07                  | 0.173                | 1E-12                  | 0.0243 | Crispld2      | cysteine-rich secretory protein LCCL domain containing 2        | AK019034  | 78892 8 E1     |
| 1424923_at   | 222             | 239             | 281             | 896             | 3.7442       | 0.929        | 0.3133       | 1.2629               | 1E-06                  | 0.6539               | 5E-06                  | 0.1848 | Serpina3g     | serine (or cysteine) peptidase inhibitor, clade A, member 3G    | BC002065  | 20715 12 E     |
| 1437173_at   | 271             | 399             | 413             | 1480            | 3.7082       | 0.6793       | 0.2793       | 1.5246               | 2E-09                  | 0.0023               | 5E-10                  | 0.0006 | S1pr3         | sphingosine-1-phosphate receptor 3                              | BB532532  | 13610 13 B1    |
| 1444821_s_at | 237             | 304             | 357             | 1119            | 3.6799       | 0.7805       | 0.3194       | 1.5058               | 1E-05                  | 0.0697               | 1E-05                  | 0.0054 | Aspn          | aspirin                                                         | NM_025711 | 66695 13 B1    |
| 1456335_at   | 51              | 44              | 47              | 161             | 3.6654       | 1.1654       | 0.2916       | 0.9172               | 2E-06                  | 0.4103               | 2E-06                  | 0.6206 | Gm106         | gene model 106, (NCBI)                                          | BB258317  | 226866 1 A3    |
| 1427395_a_at | 63              | 189             | 146             | 681             | 3.6063       | 0.3356       | 0.2142       | 2.3018               | 6E-06                  | 0.0105               | 1E-05                  | 0.0346 | Aldh1a3       | aldehyde dehydrogenase family 1, subfamily A3                   | BC026667  | 56847 7 C      |
| 1416203_at   | 253             | 485             | 351             | 1738            | 3.58         | 0.5214       | 0.2019       | 1.3866               | 8E-10                  | 8E-05                | 6E-09                  | 0.018  | Aqp1          | aquaporin 1                                                     | NM_007472 | 11826 6 B3     |
| 1419015_at   | 753             | 754             | 889             | 2693            | 3.5712       | 0.9981       | 0.3301       | 1.1811               | 2E-08                  | 0.9865               | 2E-08                  | 0.136  | Wispl2        | WNT1 inducible signaling pathway protein 2                      | NM_016873 | 22403 2 H3     |
| 1418133_at   | 78              | 73              | 96              | 260             | 3.5434       | 1.0687       | 0.3683       | 1.2211               | 6E-07                  | 0.5921               | 3E-07                  | 0.0747 | Bcl3          | B-cell leukemia/lymphoma 3                                      | NM_033601 | 12051 7 A3     |
| 1418842_at   | 86              | 40              | 48              | 141             | 3.5351       | 2.1676       | 0.3412       | 0.5564               | 0.0003                 | 0.0058               | 4E-05                  | 0.0032 | Hcls1         | hematopoietic cell specific Lyn substrate 1                     | NM_008225 | 15163 16 B     |
| 1434758_at   | 364             | 434             | 453             | 1525            | 3.5169       | 0.8405       | 0.2968       | 1.2418               | 2E-10                  | 0.0038               | 3E-11                  | 0.0005 | Crispld2      | cysteine-rich secretory protein LCCL domain containing 2        | BB745401  | 78892 8 E1     |
| 1449939_s_at | 460             | 630             | 495             | 2213            | 3.5135       | 0.7298       | 0.2239       | 1.0779               | 5E-09                  | 0.0005               | 3E-09                  | 0.3601 | Dlk1          | delta-like 1 homolog (Drosophila)                               | NM_010052 | 13386 12 E-F1  |
| 1417642_at   | 88              | 176             | 147             | 614             | 3.4847       | 0.4998       | 0.2389       | 1.6654               | 7E-09                  | 0.0006               | 2E-08                  | 0.0051 | Aldh1a3       | aldehyde dehydrogenase family 1, subfamily A3                   | AF253409  | 56847 7 C      |
| 1438658_a_at | 849             | 1215            | 1197            | 4201            | 3.457        | 0.6989       | 0.2849       | 1.4092               | 3E-10                  | 0.0026               | 5E-10                  | 0.0027 | S1pr3         | sphingosine-1-phosphate receptor 3                              | AV238324  | 13610 13 B1    |
| 1419042_at   | 149             | 172             | 67              | 591             | 3.4332       | 0.8676       | 0.1141       | 0.4514               | 7E-05                  | 0.492                | 3E-08                  | 0.0007 | Iigp1         | interferon inducible GTPase 1                                   | BM239828  | 60440 18 D3    |
| 1425145_at   | 603             | 1120            | 954             | 3845            | 3.4316       | 0.538        | 0.2482       | 1.5834               | 6E-08                  | 0.0003               | 4E-11                  | 0.0003 | Il1rl1        | interleukin 1 receptor-like 1                                   | D13695    | 17082 1 B      |
| 1435477_s_at | 72              | 59              | 40              | 204             | 3.4219       | 1.2117       | 0.1953       | 0.5515               | 3E-06                  | 0.2747               | 1E-07                  | 0.004  | Fcgr2b        | Fc receptor, IgG, low affinity IIb                              | BM224327  | 14130 1 H3     |
| 1448775_at   | 117             | 197             | 95              | 671             | 3.3985       | 0.5907       | 0.1412       | 0.8126               | 2E-05                  | 0.0093               | 2E-08                  | 0.1307 | Ifi203        | interferon activated gene 203                                   | NM_008328 | 15950 1 H3     |
| 1455844_at   | 53              | 34              | 29              | 114             | 3.3639       | 1.557        | 0.2545       | 0.55                 | 0.0079                 | 0.2679               | 0.0029                 | 0.1326 | Cables1       | Cdk5 and Abl enzyme substrate 1                                 | BI079333  | 63955 18 A2    |
| 1427054_s_at | 47              | 50              | 45              | 165             | 3.3199       | 0.9407       | 0.2734       | 0.9648               | 2E-06                  | 0.7379               | 2E-09                  | 0.8008 | Abi3bp        | ABI gene family, member 3 (NESH) binding protein                | BC026627  | 320712 16 C.1  |
| 1418666_at   | 521             | 546             | 474             | 1811            | 3.3189       | 0.9549       | 0.2617       | 0.9095               | 7E-07                  | 0.6636               | 7E-08                  | 0.3617 | Ptx3          | pentraxin related gene                                          | NM_008987 | 19288 3 E1     |
| 1418204_s_at | 72              | 50              | 20              | 164             | 3.3025       | 1.4443       | 0.1209       | 0.2765               | 3E-07                  | 0.0065               | 1E-06                  | 0.0001 | Aif1          | allograft inflammatory factor 1                                 | NM_019467 | 11629 17 B1    |
| 1417633_at   | 163             | 58              | 134             | 192             | 3.295        | 2.7982       | 0.6991       | 0.8232               | 4E-05                  | 0.0036               | 0.0051                 | 0.3867 | Sod3          | superoxide dismutase 3, extracellular                           | NM_011435 | 20657 5 C1     |
| 1436124_at   | 47              | 43              | 47              | 139             | 3.2514       | 1.0974       | 0.3413       | 1.0114               | 4E-05                  | 0.6459               | 1E-05                  | 0.9481 | Pcyt1b        | phosphate cytidylyltransferase 1, choline, beta isoform         | BE996519  | 236899 X C3    |
| 1424808_at   | 83              | 82              | 81              | 265             | 3.2474       | 1.0196       | 0.3045       | 0.9697               | 1E-06                  | 0.9198               | 1E-06                  | 0.8692 | Lama4         | laminin, alpha 4                                                | BB053010  | 16775 10 B1    |
| 1448475_at   | 475             | 371             | 360             | 1199            | 3.2285       | 1.2801       | 0.3          | 0.7565               | 4E-08                  | 0.0527               | 7E-08                  | 0.0379 | Olfml3        | olfactomedin-like 3                                             | NM_133859 | 99543 3 F2.2   |
| 1420389_at   | 274             | 134             | 125             | 431             | 3.2168       | 2.0476       | 0.2901       | 0.4558               | 5E-08                  | 0.0005               | 1E-06                  | 0.0006 | Pax3          | paired box gene 3                                               | NM_008781 | 18505 1 C4     |
| 1431008_at   | 57              | 64              | 25              | 205             | 3.2034       | 0.8964       | 0.1237       | 0.4421               | 5E-05                  | 0.7074               | 0.0015                 | 0.1531 | O610037M15Rik | RIKEN cDNA O610037M15 gene                                      | BG916808  | 68395          |
| 1424948_x_at | 329             | 372             | 192             | 1180            | 3.1734       | 0.8849       | 0.1623       | 0.5821               | 1E-05                  | 0.2787               | 3E-08                  | 0.0002 | H2-K1         | histocompatibility 2, K1, K region                              | L23495    | 14972 17 B1    |
| 1418156_at   | 45              | 36              | 32              | 114             | 3.1711       | 1.264        | 0.2819       | 0.7073               | 0.0002                 | 0.4533               | 0.0006                 | 0.3161 | Kcne4         | potassium voltage-gated channel, Isk-related subfamily, gene 4  | NM_021342 | 57814 1 C4     |
| 1457664_x_at | 90              | 39              | 42              | 123             | 3.1574       | 2.3059       | 0.3411       | 0.467                | 0.0061                 | 0.0339               | 0.0042                 | 0.0303 | C2            | complement component 2 (within H-2S)                            | AV227574  | 12263 17 B1    |
| 1430335_a_at | 244             | 132             | 139             | 415             | 3.1491       | 1.8483       | 0.3361       | 0.5727               | 1E-07                  | 0.0044               | 3E-06                  | 0.0095 | Pax3          | paired box gene 3                                               | AK012493  | 18505 1 C4     |
| 1451944_a_at | 34              | 38              | 54              | 119             | 3.1359       | 0.9021       | 0.4561       | 1.5853               | 3E-05                  | 0.7972               | 0.0005                 | 0.2289 | Tnfrsf11      | tumor necrosis factor (ligand) superfamily, member 11           | AB032771  | 21943 14 D3    |
| 1460667_at   | 37              | 65              | 53              | 201             | 3.1091       | 0.5781       | 0.264        | 1.4199               | 9E-06                  | 0.0906               | 0.0001                 | 0.3048 | U90926        | cDNA sequence U90926                                            | NM_020562 | 57425 5 E2     |
| 1421996_at   | 149             | 73              | 91              | 224             | 3.0778       | 2.0384       | 0.4044       | 0.6107               | 0.0002                 | 0.0076               | 2E-05                  | 0.0074 | Tcfap2a       | transcription factor AP-2, alpha                                | NM_011547 | 21418 13 A5-B1 |
| 1441165_s_at | 105             | 47              | 71              | 142             | 3.0522       | 2.2607       | 0.4985       | 0.6731               | 1E-06                  | 0.0093               | 4E-05                  | 0.1128 | C12n2         | calyntenin 2                                                    | AI448973  | 6408           |
| 1419043_a_at | 446             | 592             | 200             | 1804            | 3.0485       | 0.753        | 0.1107       | 0.4481               | 8E-05                  | 0.1429               | 4E-09                  | 0.0001 | Iigp1         | interferon inducible GTPase 1                                   | BM239828  | 60440 18 D3    |
| 1450696_at   | 99              | 84              | 42              | 255             | 3.0383       | 1.1814       | 0.1634       | 0.4202               | 2E-06                  | 0.2179               | 8E-06                  | 0.0032 | Psmb9         | proteasome (prosome, macropain) subunit, beta type 9 (large n   | NM_013585 | 16912 17 B1    |
| 1457035_at   | 102             | 91              | 51              | 276             | 3.031        | 1.1185       | 0.1858       | 0.5035               | 1E-05                  | 0.4955               | 4E-06                  | 0.0077 | Al607873      | expressed sequence Al607873                                     | AI607873  | 226691 1 H3    |
| 1421855_at   | 48              | 35              | 26              | 105             | 3.0206       | 1.3817       | 0.2493       | 0.5451               | 0.0014                 | 0.3126               | 8E-06                  | 0.0254 | Fgl2          | fibrinogen-like protein 2                                       | BF136544  | 14190 5 A3     |
| 1422013_at   | 41              | 44              | 12              | 132             | 2.9946       | 0.924        | 0.0918       | 0.2974               | 8E-07                  | 0.585                | 0.0002                 | 0.0196 | Clec4a2       | C-type lectin domain family 4, member a2                        | NM_011999 | 26888 6 F3     |
| 1429310_at   | 309             | 292             | 274             | 875             | 2.9931       | 1.0576       | 0.313        | 0.8857               | 1E-07                  | 0.5284               | 1E-06                  | 0.3318 | Flrt3         | fibronectin leucine rich transmembrane protein 3                | BE945486  | 71436 2 F3     |
| 1426937_at   | 88              | 109             | 121             | 323             | 2.9697       | 0.8135       | 0.3751       | 1.3694               | 1E-07                  | 0.0067               | 1E-06                  | 0.004  | G33040615Rik  | RIKEN cDNA G33040615 gene                                       | AK018128  | 70717 5 G3     |
| 1416321_s_at | 187             | 65              | 68              | 193             | 2.9593       | 2.8699       | 0.354        | 0.365                | 6E-06                  | 0.0003               | 0.0101                 | 0.0175 | Prepl         | proline arginine-rich end leucine-rich repeat                   | NM_054077 | 116847 1 E4    |
| 1449945_at   | 96              | 103             | 89              | 305             | 2.9487       | 0.9289       | 0.2909       | 0.9235               | 6E-07                  | 0.3388               | 2E-08                  | 0.239  | Ppargc1b      | peroxisome proliferative activated receptor, gamma, coactivator | NM_133249 | 170826 18 E1   |
| 1446682_at   | 145             | 83              | 117             | 244             | 2.9431       | 1.7488       | 0.4784       | 0.8051               | 4E-05                  | 0.071                | 0.0237                 | 0.5466 |               |                                                                 | BB660139  |                |
| 1453571_at   | 30              | 40              | 83              | 118             | 2.9381       | 0.738        | 0.699        | 2.7829               | 0.0003                 | 0.4523               | 0.0451                 | 0.0133 | Depdc6        | DEP domain containing 6                                         | BB324973  | 97998 15 D1    |
| 1450430_at   | 143             | 117             | 73              | 342             | 2.911        | 1.2195       | 0.2143       | 0.5115               | 1E-10                  | 0.044                | 3E-07                  | 0.001  | Mrc1          | mannose receptor, C type 1                                      | NM_008625 | 17533 2 A2     |

Table S1 - M vs F (WT)

| Probe Set ID | Female<br>Cd82-<br>/-  | Female<br>Cd82<br>+/+  | Male<br>Cd82-<br>/     | Male<br>Cd82+<br>/     | Male<br>Cd82+/<br>/        | Female<br>Cd82-/<br>/       | Male<br>Cd82-/<br>/         | p-value<br>Male<br>Cd82+/<br>+ vs<br>Female<br>Cd82-/<br>+ | p-value<br>Female<br>Cd82+/<br>+ vs<br>Female<br>Cd82-/<br>- | p-value<br>Male<br>Cd82+/<br>+ vs<br>Male<br>Cd82-/<br>- | p-value<br>M/F<br>Cd82-/<br>- vs<br>Cd82-/<br>- | Gene   | Description   | GB                                                                 | Entrez Id | Cytoband |          |
|--------------|------------------------|------------------------|------------------------|------------------------|----------------------------|-----------------------------|-----------------------------|------------------------------------------------------------|--------------------------------------------------------------|----------------------------------------------------------|-------------------------------------------------|--------|---------------|--------------------------------------------------------------------|-----------|----------|----------|
|              | averag<br>ge<br>signal | averag<br>ge<br>signal | averag<br>ge<br>signal | averag<br>ge<br>signal | FMale<br>Cd82+/<br>+ Ratio | Female<br>Cd82+/<br>+ Ratio | / Male<br>Cd82+/<br>+ Ratio | Female<br>Cd82-/<br>Ratio                                  | Female<br>Cd82-/<br>-                                        | Male<br>Cd82-/<br>-                                      | Female<br>Cd82-/<br>-                           |        |               |                                                                    |           |          |          |
| 1418872_at   | 201                    | 202                    | 206                    | 587                    | 2.9075                     | 0.9959                      | 0.3514                      | 1.0258                                                     | 3E-07                                                        | 0.9523                                                   | 4E-07                                           | 0.7626 | Abcb1b        | ATP-binding cassette, sub-family B (MDR/TAP), member 1B            | NM_011075 | 18669    | 5 A2-A3  |
| 1419604_at   | 48                     | 78                     | 25                     | 227                    | 2.9013                     | 0.6067                      | 0.1085                      | 0.5186                                                     | 0.001                                                        | 0.0501                                                   | 3E-06                                           | 0.0179 | Zbp1          | Z-DNA binding protein 1                                            | NM_021394 | 58203    | 2 H3     |
| 1423260_at   | 314                    | 221                    | 253                    | 639                    | 2.8945                     | 1.4235                      | 0.3961                      | 0.8054                                                     | 7E-06                                                        | 0.0125                                                   | 4E-06                                           | 0.0609 | Id4           | inhibitor of DNA binding 4                                         | BB121406  | 15904    | 13 B     |
| 1417381_at   | 1288                   | 988                    | 528                    | 2825                   | 2.8591                     | 1.3036                      | 0.1869                      | 0.4098                                                     | 8E-11                                                        | 2E-05                                                    | 7E-10                                           | 3E-07  | C1qa          | complement component 1, q subcomponent, alpha polypeptide          | NM_007572 | 12259    | 4 D3     |
| 1435990_at   | 44                     | 64                     | 90                     | 183                    | 2.8424                     | 0.6762                      | 0.4917                      | 2.0671                                                     | 8E-06                                                        | 0.2948                                                   | 4E-05                                           | 0.0453 | Adamts2       | a disintegrin-like and metallopeptidase (reprolysin type) with thr | BG073461  | 216725   | 11 B1.3  |
| 1421001_a_at | 36                     | 36                     | 41                     | 103                    | 2.8322                     | 0.9984                      | 0.3967                      | 1.1253                                                     | 0.0019                                                       | 0.995                                                    | 3E-07                                           | 0.2504 | Car6          | carbonic anhydrase 6                                               | NM_009802 | 12353    | 4 E2     |
| 1416652_at   | 340                    | 476                    | 530                    | 1347                   | 2.8294                     | 0.7144                      | 0.3938                      | 1.5594                                                     | 1E-06                                                        | 0.0004                                                   | 1E-05                                           | 0.0015 | Aspn          | asporin                                                            | NM_025711 | 66695    | 13 B1    |
| 1416715_at   | 462                    | 495                    | 544                    | 1398                   | 2.8257                     | 0.9345                      | 0.3893                      | 1.1773                                                     | 1E-07                                                        | 0.2299                                                   | 4E-07                                           | 0.0403 | Gjb3          | gap junction protein, beta 3                                       | NM_008126 | 14620    | 4 D2.2   |
| 1422979_at   | 46                     | 64                     | 59                     | 180                    | 2.8203                     | 0.7201                      | 0.3283                      | 1.2859                                                     | 1E-05                                                        | 0.1564                                                   | 1E-06                                           | 0.2221 | Suv39h2       | suppressor of variegation 3-9 homolog 2 (Drosophila)               | NM_022724 | 64707    | 2 2.5 cM |
| 1439902_at   | 78                     | 56                     | 41                     | 159                    | 2.8191                     | 1.3889                      | 0.2572                      | 0.5221                                                     | 2E-05                                                        | 0.0781                                                   | 4E-07                                           | 0.0014 | C5ar1         | complement component 5a receptor 1                                 | BB552085  | 12273    | 7 A2     |
| 1424443_at   | 122                    | 78                     | 46                     | 219                    | 2.8167                     | 1.57                        | 0.2088                      | 0.3747                                                     | 6E-07                                                        | 0.0007                                                   | 1E-05                                           | 0.0006 | Tm6sf1        | transmembrane 6 superfamily member 1                               | AV378394  | 107769   | 7 D1     |
| 1443229_at   | 13                     | 37                     | 12                     | 104                    | 2.8104                     | 0.3507                      | 0.1157                      | 0.9277                                                     | 0.0015                                                       | 0.0272                                                   | 5E-05                                           | 0.8659 | Atad2         | ATPase family, AAA domain containing 2                             | AV319821  | 70472    | 15 D2    |
| 1449175_at   | 81                     | 56                     | 39                     | 158                    | 2.8015                     | 1.4423                      | 0.2445                      | 0.475                                                      | 2E-05                                                        | 0.0487                                                   | 4E-05                                           | 0.0071 | Gpr65         | G-protein coupled receptor 65                                      | NM_008152 | 14744    | 12 E     |
| 1425894_at   | 77                     | 90                     | 88                     | 251                    | 2.7939                     | 0.8547                      | 0.3492                      | 1.1416                                                     | 8E-06                                                        | 0.4679                                                   | 3E-05                                           | 0.5515 | Mrgprf        | MAS-related GPR, member F                                          | BC019711  | 211577   | 7 F5     |
| 1420380_at   | 806                    | 939                    | 919                    | 2622                   | 2.7917                     | 0.8577                      | 0.3504                      | 1.1406                                                     | 1E-08                                                        | 0.0438                                                   | 3E-09                                           | 0.0728 | Ccl2          | chemokine (C-C motif) ligand 2                                     | AF065933  | 20296    | 11 C-E1  |
| 1416051_at   | 92                     | 62                     | 68                     | 172                    | 2.7877                     | 1.4885                      | 0.3967                      | 1.7411                                                     | 0.0005                                                       | 0.2121                                                   | 0.0001                                          | 0.2681 | C2            | complement component 2 (within H-2S)                               | NM_013484 | 12263    | 7 B1     |
| 1434667_at   | 84                     | 84                     | 92                     | 232                    | 2.7756                     | 1.0071                      | 0.3958                      | 1.0908                                                     | 8E-05                                                        | 0.9678                                                   | 7E-05                                           | 0.5991 | Col8a2        | collagen, type VIII, alpha 2                                       | BG229308  | 329941   | 4 D2.2   |
| 1424041_s_at | 116                    | 57                     | 83                     | 156                    | 2.7525                     | 2.0323                      | 0.5283                      | 0.7155                                                     | 4E-06                                                        | 5E-05                                                    | 7E-05                                           | 0.0048 | C1s           | complement component 1, s subcomponent                             | BC022123  | 50908    | 6 F2     |
| 1424067_at   | 138                    | 63                     | 79                     | 174                    | 2.752                      | 2.1772                      | 0.4532                      | 0.5729                                                     | 7E-05                                                        | 0.0014                                                   | 0.0004                                          | 0.0086 | Icam1         | intercellular adhesion molecule 1                                  | BC008626  | 15894    | 9 A3     |
| 1419132_at   | 106                    | 76                     | 83                     | 210                    | 2.7498                     | 1.3918                      | 0.3946                      | 0.7796                                                     | 8E-06                                                        | 0.0515                                                   | 1E-08                                           | 0.0366 | Tlr2          | toll-like receptor 2                                               | NM_011905 | 24088    | 3 E3     |
| 1455396_at   | 56                     | 63                     | 80                     | 173                    | 2.7487                     | 0.8962                      | 0.4639                      | 1.4228                                                     | 5E-06                                                        | 0.557                                                    | 9E-06                                           | 0.055  | Atp8b1        | ATPase, class I, type 8B, member 1                                 | BF451402  | 54670    | 18 E1    |
| 1434903_s_at | 154                    | 182                    | 172                    | 499                    | 2.7456                     | 0.8501                      | 0.3451                      | 1.1148                                                     | 2E-08                                                        | 0.0408                                                   | 6E-10                                           | 0.0913 | Il1rl2        | interleukin 1 receptor-like 2                                      | BG073776  | 107527   | 1 B      |
| 1439831_at   | 70                     | 106                    | 34                     | 289                    | 2.7219                     | 0.6583                      | 0.1191                      | 0.4922                                                     | 5E-05                                                        | 0.0101                                                   | 6E-07                                           | 0.0034 |               |                                                                    | AW111920  |          |          |
| 1424131_at   | 1471                   | 3923                   | 3119                   | 10666                  | 2.7187                     | 0.3749                      | 0.2924                      | 2.1206                                                     | 2E-11                                                        | 1E-09                                                    | 1E-07                                           | 1E-05  | Col6a3        | collagen, type VI, alpha 3                                         | AF064749  | 12835    | 1 D      |
| 1420671_x_at | 37                     | 44                     | 23                     | 119                    | 2.6846                     | 0.8253                      | 0.192                       | 0.6246                                                     | 1E-06                                                        | 0.3268                                                   | 3E-05                                           | 0.1164 | Ms4a4c        | membrane-spanning 4-domains, subfamily A, member 4C                | NM_029499 | 64380    | 19 A     |
| 1459816_x_at | 103                    | 44                     | 63                     | 116                    | 2.6752                     | 2.3703                      | 0.5417                      | 0.6114                                                     | 0.0017                                                       | 0.0869                                                   | 0.0991                                          | 0.3372 | Pole3         | polymerase (DNA directed), epsilon 3 (p17 subunit)                 | BB060663  | 59001    | 4 C1     |
| 1425336_x_at | 2752                   | 3236                   | 1785                   | 8648                   | 2.6725                     | 0.8506                      | 0.2064                      | 0.6486                                                     | 6E-06                                                        | 0.173                                                    | 6E-09                                           | 0.0008 | H2-K1         | histocompatibility 2, K1, K region                                 | BC011306  | 14972    | 17 B1    |
| 1422962_a_at | 351                    | 473                    | 216                    | 1262                   | 2.6681                     | 0.7413                      | 0.1714                      | 0.617                                                      | 2E-05                                                        | 0.043                                                    | 1E-09                                           | 0.0003 | Psmb8         | proteasome (prosome, macropain) subunit, beta type 8 (large n      | NM_010724 | 16913    | 17 B1    |
| 1425407_s_at | 43                     | 45                     | 31                     | 121                    | 2.6662                     | 0.9407                      | 0.2524                      | 0.7154                                                     | 0.0003                                                       | 0.7207                                                   | 6E-05                                           | 0.1335 | Clec4a2       | C-type lectin domain family 4, member a2                           | BC006623  | 26888    | 6 F3     |
| 1458453_at   | 60                     | 62                     | 46                     | 166                    | 2.6581                     | 0.9577                      | 0.2787                      | 0.7736                                                     | 4E-05                                                        | 0.8574                                                   | 0.0013                                          | 0.4646 | Lmo7          | LIM domain only 7                                                  | AW553387  | 380928   | 14 E2.3  |
| 1430485_at   | 58                     | 81                     | 84                     | 214                    | 2.6478                     | 0.7181                      | 0.391                       | 1.4416                                                     | 9E-07                                                        | 0.0217                                                   | 0.0004                                          | 0.0933 | Trpc2         | transient receptor potential cation channel, subfamily C, membe    | AW324327  | 22064    | 7 F1     |
| 1452296_at   | 524                    | 401                    | 496                    | 1059                   | 2.6419                     | 1.3074                      | 0.4682                      | 0.946                                                      | 5E-08                                                        | 0.0505                                                   | 2E-06                                           | 0.6568 | Slit3         | slit homolog 3 (Drosophila)                                        | BM570006  | 20564    |          |
| 1425094_a_at | 80                     | 63                     | 61                     | 166                    | 2.6415                     | 1.277                       | 0.3681                      | 0.7614                                                     | 6E-08                                                        | 0.0184                                                   | 0.0001                                          | 0.1452 | Lhx6          | LIM homeobox protein 6                                             | AB031040  | 16874    | 2 B      |
| 1420464_s_at | 50                     | 39                     | 36                     | 104                    | 2.6378                     | 1.2764                      | 0.345                       | 0.713                                                      | 0.0007                                                       | 0.2696                                                   | 5E-05                                           | 0.0794 | Pira6         | paired-Ig-like receptor A6                                         | NM_011093 | 18729    | 7 A1     |
| 1419598_at   | 361                    | 320                    | 155                    | 842                    | 2.6348                     | 1.1306                      | 0.1846                      | 0.4302                                                     | 1E-05                                                        | 0.26                                                     | 4E-06                                           | 0.0009 | Ms4a6d        | membrane-spanning 4-domains, subfamily A, member 6D                | NM_026835 | 68774    | 19 A     |
| 1452244_at   | 177                    | 187                    | 217                    | 493                    | 2.6324                     | 0.9452                      | 0.4391                      | 1.2227                                                     | 7E-06                                                        | 0.5952                                                   | 3E-05                                           | 0.1041 | 633040615Rik  | RIKEN cDNA 633040615 gene                                          | AK018128  | 70717    | 5 G3     |
| 1420798_s_at | 88                     | 55                     | 55                     | 145                    | 2.6285                     | 1.5867                      | 0.3764                      | 0.6235                                                     | 0.0005                                                       | 0.016                                                    | 0.0001                                          | 0.0057 | Pcdha1        | protocadherin alpha 1                                              | NM_054072 | 116731   |          |
| 1438511_a_at | 173                    | 95                     | 139                    | 248                    | 2.6066                     | 1.8197                      | 0.5595                      | 0.8014                                                     | 9E-06                                                        | 0.0003                                                   | 0.0008                                          | 0.095  | 1190002H23Rik | RIKEN cDNA 1190002H23 gene                                         | BB408123  | 66214    | 14 D3    |
| 1424339_at   | 70                     | 87                     | 72                     | 226                    | 2.6053                     | 0.8049                      | 0.3179                      | 1.0289                                                     | 3E-05                                                        | 0.2265                                                   | 6E-06                                           | 0.869  | Oasl1         | 2'-5' oligoadenylate synthetase-like 1                             | AB067533  | 231655   | 5 F      |
| 1416625_at   | 169                    | 117                    | 127                    | 305                    | 2.6034                     | 1.4394                      | 0.4161                      | 0.7526                                                     | 5E-07                                                        | 0.0096                                                   | 6E-06                                           | 0.0477 | Serping1      | serine (or cysteine) peptidase inhibitor, clade G, member 1        | NM_009776 | 12258    | 2 D      |
| 1448755_at   | 60                     | 93                     | 67                     | 243                    | 2.6005                     | 0.6435                      | 0.277                       | 1.1195                                                     | 7E-06                                                        | 0.0032                                                   | 2E-05                                           | 0.5182 | Col15a1       | collagen, type XV, alpha 1                                         | AF011450  | 12819    | 4 B1-B3  |
| 1443219_at   | 166                    | 259                    | 201                    | 671                    | 2.5963                     | 0.6438                      | 0.2987                      | 1.2046                                                     | 2E-07                                                        | 0.0005                                                   | 6E-06                                           | 0.2301 |               |                                                                    | BM232535  |          |          |
| 1424010_at   | 137                    | 211                    | 173                    | 547                    | 2.594                      | 0.6515                      | 0.3158                      | 1.2575                                                     | 1E-05                                                        | 0.0029                                                   | 5E-07                                           | 0.0392 | Mfap4         | microfibrillar-associated protein 4                                | BC022666  | 76293    | 11 B2    |
| 1448201_at   | 111                    | 68                     | 85                     | 176                    | 2.5922                     | 1.6287                      | 0.4814                      | 0.7662                                                     | 0.0001                                                       | 0.0562                                                   | 8E-05                                           | 0.1861 | Sfrp2         | secreted frizzled-related protein 2                                | NM_009144 | 20319    | 3 E2     |
| 1450928_at   | 496                    | 370                    | 377                    | 951                    | 2.5726                     | 1.342                       | 0.3963                      | 0.7596                                                     | 1E-06                                                        | 0.006                                                    | 4E-07                                           | 0.0067 | Id4           | inhibitor of DNA binding 4                                         | BB121406  | 15904    | 13 B     |
| 1460437_at   | 101                    | 58                     | 31                     | 150                    | 2.5682                     | 1.7215                      | 0.2052                      | 0.3061                                                     | 5E-07                                                        | 0.0003                                                   | 0.0001                                          | 0.0014 | Cyth4         | cytohesin 4                                                        | AK010908  | 72318    | 15 E1    |
| 1417595_at   | 56                     | 143                    | 92                     | 366                    | 2.555                      | 0.3911                      | 0.2522                      | 1.6475                                                     | 3E-05                                                        | 0.0005                                                   | 0.0001                                          | 0.0758 | Meox1         | mesenchyme homeobox 1                                              | NM_010791 | 17285    | 11 D     |
| 1458669_at   | 80                     | 101                    | 77                     | 258                    | 2.5547                     | 0.7945                      | 0.2975                      | 0.9566                                                     | 6E-06                                                        | 0.3088                                                   | 9E-07                                           | 0.833  |               |                                                                    | BG862223  |          |          |
| 1445574_at   | 49                     | 46                     | 42                     | 118                    | 2.542                      | 1.0559                      | 0.3533                      | 0.8505                                                     | 0.0002                                                       | 0.7235                                                   | 8E-05                                           | 0.3332 |               |                                                                    | BG067678  |          |          |
| 1433795_at   | 240                    | 287                    | 287                    | 730                    | 2.5418                     | 0.8343                      | 0.3926                      | 1.1962                                                     | 4E-08                                                        | 0.0393                                                   | 8E-10                                           | 0.0174 | Tgfb3         | transforming growth factor, beta receptor III                      | BM122301  | 21814    | 5 E5     |
| 1442338_at   | 25                     | 53                     | 30                     | 135                    | 2.5407                     | 0.4647                      | 0.2244                      | 1.227                                                      | 0.0002                                                       | 0.1411                                                   | 6E-05                                           | 0.6689 |               |                                                                    | BB740904  |          |          |
| 1433885_at   | 206                    | 111                    | 116                    | 281                    | 2.5388                     | 1.8567                      | 0.411                       | 0.562                                                      | 8E-05                                                        | 0.0019                                                   | 3E-06                                           | 0.0002 | Iqgap2        | IQ motif containing GTPase activating protein 2                    | BM240173  | 544963   | 13 D1    |
| 1456258_at   | 293                    | 168                    | 214                    | 426                    | 2.5352                     | 1.7425                      | 0.5014                      | 0.7295                                                     | 1E-07                                                        | 2E-06                                                    | 7E-08                                           | 4E-06  | Emx2          | empty spiracles homolog 2 (Drosophila)                             | BG072869  | 13797    | 19 D3    |
| 1451683_x_at | 1018                   | 1132                   | 651                    | 2865                   | 2.5312                     | 0.8993                      | 0.2273                      | 0.6398                                                     | 6E-05                                                        | 0.3739                                                   | 1E-07                                           | 0.0007 | H2-K1         | histocompatibility 2, K1, K region                                 | M34962    | 14972    | 17 B1    |
| 1426112_a_at | 328                    | 216                    | 132                    | 545                    | 2.5278                     | 1.523                       | 0.2417                      | 0.4012                                                     | 5E-08                                                        | 0.0048                                                   | 2E-08                                           | 2E-05  | Cd72          | CD72 antigen                                                       | BC003824  | 12517    | 4 B1     |
| 1429229_s_at | 40                     | 40                     | 52                     | 102                    | 2.5266                     | 0.9838                      | 0.5153                      | 1.3235                                                     | 0.0023                                                       | 0.9647                                                   | 0.001                                           | 0.3631 | 4930534B04Rik | RIKEN cDNA 4930534B04 gene                                         | BE980134  | 75216    | 12 E     |

Table S1 - M vs F (WT)

| Probe Set ID | Femal e Cd82-/- | Femal e Cd82+/- | Male Cd82-/-    | Male Cd82+/-    | Male Cd82+/-  | Male Cd82+/-   | Male Cd82+/-   | p-value Male Cd82+/- | p-value Female Cd82+/- | p-value Male Cd82+/- | p-value Female Cd82+/- | Gene   | Description   | GB                                                                                           | Entrez Id | Cytoband          |
|--------------|-----------------|-----------------|-----------------|-----------------|---------------|----------------|----------------|----------------------|------------------------|----------------------|------------------------|--------|---------------|----------------------------------------------------------------------------------------------|-----------|-------------------|
|              | averag e signal | averag e signal | averag e signal | averag e signal | FMale Cd82+/- | Female Cd82+/- | / Male Cd82+/- | Female Cd82+/-       | + vs Female Cd82+/-    | + vs Female Cd82+/-  | + vs Male Cd82+/-      |        |               |                                                                                              |           |                   |
| 1434789_at   | 85              | 124             | 103             | 314             | 2.5237        | 0.6829         | 0.3284         | 1.2135               | 8E-07                  | 0.0143               | 5E-08                  | 0.1337 | Depdc1b       | DEP domain containing 1B                                                                     | BB136172  | 218581 13 D2.1    |
| 1435827_at   | 75              | 94              | 89              | 236             | 2.5231        | 0.8061         | 0.3775         | 1.1815               | 0.0001                 | 0.2736               | 1E-05                  | 0.3254 | 4933404O12Rik | RIKEN cDNA 4933404O12 gene                                                                   | BB501711  | 66752             |
| 1450905_at   | 101             | 68              | 62              | 171             | 2.5161        | 1.478          | 0.3626         | 0.6173               | 1E-05                  | 0.0221               | 1E-05                  | 0.0102 | Plxnc1        | plexin C1                                                                                    | BB476707  | 54712 10 C3       |
| 1425620_at   | 55              | 51              | 47              | 127             | 2.5114        | 1.0758         | 0.3675         | 0.858                | 0.0001                 | 0.6235               | 8E-07                  | 0.1453 | Tgfb3         | transforming growth factor, beta receptor III                                                | AF039601  | 21814 5 E5        |
| 1417127_at   | 56              | 56              | 68              | 140             | 2.5076        | 1.0011         | 0.4859         | 1.2171               | 3E-05                  | 0.9952               | 0.0001                 | 0.2648 | Msx1          | homeobox, msh-like 1                                                                         | BC016426  | 17701 5 B3        |
| 1449528_at   | 142             | 169             | 193             | 424             | 2.5055        | 0.8376         | 0.4547         | 1.36                 | 1E-06                  | 0.0519               | 2E-06                  | 0.0031 | Figf          | c-fos induced growth factor                                                                  | NM_010216 | 14205 X F5        |
| 1438160_x_at | 91              | 71              | 73              | 177             | 2.4949        | 1.2804         | 0.4116         | 0.802                | 6E-06                  | 0.0524               | 3E-05                  | 0.1267 | Slco4a1       | solute carrier organic anion transporter family, member 4a1                                  | AV348121  | 108115 2 H4       |
| 1450924_at   | 106             | 140             | 115             | 350             | 2.4912        | 0.756          | 0.3298         | 1.0867               | 2E-07                  | 0.0456               | 3E-07                  | 0.5348 | Hdgfr3        | hepatoma-derived growth factor, related protein 3                                            | BB291880  | 29877 7 D3        |
| 1451905_a_at | 44              | 42              | 17              | 105             | 2.4912        | 1.0367         | 0.1599         | 0.3843               | 0.0003                 | 0.8724               | 5E-05                  | 0.0102 | Mx1           | myxovirus (influenza virus) resistance 1                                                     | M21039    | 17857 16 71.2 cM  |
| 1459894_at   | 138             | 85              | 62              | 211             | 2.483         | 1.6183         | 0.2918         | 0.4477               | 4E-05                  | 0.005                | 7E-06                  | 0.0003 | Iqgap2        | IQ motif containing GTPase activating protein 2                                              | BE631962  | 544963 13 D1      |
| 1434194_at   | 153             | 129             | 128             | 319             | 2.4727        | 1.1857         | 0.4006         | 0.8355               | 1E-05                  | 0.1739               | 5E-07                  | 0.0869 | Mtap2         | microtubule-associated protein 2                                                             | AV337593  | 17756 1 C3        |
| 1435343_at   | 154             | 148             | 97              | 365             | 2.4695        | 1.0413         | 0.2658         | 0.6305               | 3E-07                  | 0.5776               | 2E-07                  | 0.0016 | Dock10        | dedicator of cytokinesis 10                                                                  | BF715043  | 210293 1 C4       |
| 1426947_x_at | 1141            | 1604            | 1566            | 3939            | 2.4566        | 0.7113         | 0.3975         | 1.373                | 1E-08                  | 0.0013               | 2E-09                  | 0.0011 | Col6a2        | collagen, type VI, alpha 2                                                                   | BI455189  | 12834 10 41.1 cM  |
| 1424270_at   | 123             | 99              | 78              | 242             | 2.4517        | 1.2496         | 0.3235         | 0.6347               | 1E-05                  | 0.2257               | 2E-06                  | 0.0225 | Dclk1         | doublecortin-like kinase 1                                                                   | AW105916  | 13175 3 D         |
| 1435022_at   | 135             | 120             | 116             | 295             | 2.4509        | 1.1193         | 0.3947         | 0.8643               | 6E-07                  | 0.3936               | 2E-06                  | 0.3018 | Alx1          | ALX homeobox 1                                                                               | BB366930  | 216285 10 D1      |
| 1456288_at   | 26              | 45              | 15              | 111             | 2.4477        | 0.5843         | 0.1362         | 0.5705               | 0.0002                 | 0.2522               | 3E-06                  | 0.2195 | Slnf5         | schlafen 5                                                                                   | BB134615  | 327978 11 C       |
| 1451866_a_at | 37              | 56              | 44              | 136             | 2.4413        | 0.664          | 0.324          | 1.1912               | 0.0002                 | 0.0535               | 3E-05                  | 0.3711 | Hgf           | hepatocyte growth factor                                                                     | AF042856  | 15234 5 4.0 cM    |
| 1435014_at   | 70              | 80              | 67              | 194             | 2.4392        | 0.8837         | 0.3432         | 0.9473               | 0.0001                 | 0.2857               | 7E-06                  | 0.608  | Rab39b        | RAB39B, member RAS oncogene family                                                           | AV162168  | 67790 X A7.3      |
| 1424341_s_at | 57              | 42              | 42              | 103             | 2.4339        | 1.3434         | 0.4054         | 0.7344               | 3E-05                  | 0.0479               | 9E-05                  | 0.0706 | Pcdha6        | protocadherin alpha 6                                                                        | AW146252  | 12937 18 B2-B3    |
| 1453102_at   | 226             | 208             | 199             | 506             | 2.4258        | 1.0841         | 0.3928         | 0.8789               | 8E-07                  | 0.3782               | 8E-09                  | 0.0848 | Fln3          | fibronectin leucine rich transmembrane protein 3                                             | BE945486  | 71436 2 F3        |
| 1418061_at   | 2056            | 2375            | 2572            | 5747            | 2.4195        | 0.8655         | 0.4475         | 1.251                | 8E-10                  | 0.0053               | 2E-10                  | 0.0001 | Ltbp2         | latent transforming growth factor beta binding protein 2                                     | NM_013589 | 16997 12 D        |
| 1419589_at   | 94              | 81              | 74              | 195             | 2.416         | 1.165          | 0.3822         | 0.7927               | 7E-05                  | 0.0624               | 3E-05                  | 0.038  | Cd93          | CD93 antigen                                                                                 | BB039247  | 17064 2 G3        |
| 1456046_at   | 113             | 98              | 97              | 237             | 2.4101        | 1.1543         | 0.4088         | 0.8536               | 9E-07                  | 0.1868               | 2E-05                  | 0.2569 | Cd93          | CD93 antigen                                                                                 | AV319144  | 17064 2 G3        |
| 1448562_at   | 54              | 61              | 49              | 147             | 2.4097        | 0.8831         | 0.3319         | 0.9057               | 2E-05                  | 0.2271               | 4E-06                  | 0.4119 | Upp1          | uridine phosphorylase 1                                                                      | NM_009477 | 22271 39815.458   |
| 1421995_at   | 67              | 54              | 67              | 131             | 2.4047        | 1.243          | 0.5154         | 0.997                | 0.001                  | 0.4337               | 5E-05                  | 0.9882 | Tcfap2a       | transcription factor AP-2, alpha                                                             | NM_011547 | 21418 13 A5-B1    |
| 1434932_at   | 46              | 46              | 54              | 111             | 2.3995        | 0.9871         | 0.4906         | 1.1925               | 2E-05                  | 0.9624               | 2E-05                  | 0.4806 | Adarb1        | adenosine deaminase, RNA-specific, B1                                                        | BI734168  | 110532 10 41.4 cM |
| 1433551_at   | 76              | 53              | 37              | 127             | 2.3972        | 1.4272         | 0.2942         | 0.4942               | 0.0002                 | 0.0422               | 2E-05                  | 0.0017 | AI427515      | expressed sequence AI427515                                                                  | AV173683  | 270097 8 E1       |
| 1423327_at   | 142             | 185             | 254             | 443             | 2.3947        | 0.7683         | 0.5723         | 1.7839               | 2E-07                  | 0.0363               | 0.0002                 | 0.0008 | Rpl39l        | ribosomal protein L39-like                                                                   | AK005645  | 68172 16 A1       |
| 1419599_s_at | 410             | 346             | 180             | 828             | 2.3928        | 1.1849         | 0.218          | 0.4402               | 3E-07                  | 0.0405               | 2E-06                  | 0.0005 | Ms4a6d        | membrane-spanning 4-domains, subfamily A, member 6D                                          | NM_026835 | 68774 19 A        |
| 1426048_s_at | 129             | 96              | 93              | 230             | 2.3884        | 1.3346         | 0.4042         | 0.7233               | 3E-07                  | 0.0395               | 3E-06                  | 0.0359 | Hrc           | histidine rich calcium binding protein                                                       | BC021623  | 15464 7 B4        |
| 1421075_s_at | 56              | 51              | 62              | 121             | 2.3877        | 1.1107         | 0.5124         | 1.1014               | 0.0002                 | 0.3239               | 0.0004                 | 0.3388 | Cyp7b1        | cytochrome P450, family 7, subfamily b, polypeptide 1                                        | NM_007825 | 13123 3 A1        |
| 1448891_at   | 392             | 265             | 145             | 633             | 2.3849        | 1.4754         | 0.229          | 0.3702               | 1E-07                  | 0.0008               | 2E-08                  | 2E-06  | Fcrls         | Fc receptor-like S, scavenger receptor                                                       | BC016551  | 80891 3 F1        |
| 1419083_at   | 104             | 101             | 105             | 241             | 2.3844        | 1.025          | 0.4355         | 1.0132               | 9E-06                  | 0.8083               | 4E-07                  | 0.8633 | Tnfsf11       | tumor necrosis factor (ligand) superfamily, member 11                                        | NM_011613 | 21943 14 D3       |
| 1449265_at   | 73              | 56              | 48              | 133             | 2.384         | 1.3111         | 0.361          | 0.6565               | 2E-05                  | 0.0248               | 3E-05                  | 0.0117 | Casp1         | caspase 1                                                                                    | BC008152  | 12362 9 A1        |
| 1431087_at   | 146             | 222             | 169             | 530             | 2.3814        | 0.6557         | 0.3182         | 1.1557               | 7E-06                  | 0.0012               | 5E-08                  | 0.0869 | Spc24         | SPC24, NDC80 kinetochore complex component, homolog (S)                                      | BF577722  | 67629 9 A3        |
| 1426505_at   | 90              | 64              | 45              | 153             | 2.3784        | 1.3969         | 0.2952         | 0.5026               | 3E-05                  | 0.0441               | 1E-07                  | 0.0002 | Evi2a         | ecotropic viral integration site 2a                                                          | AI122415  | 14017 11 B5       |
| 1450534_x_at | 52              | 58              | 32              | 138             | 2.3782        | 0.8994         | 0.2284         | 0.6038               | 7E-06                  | 0.5828               | 0.0002                 | 0.1239 | H2-K1         | histocompatibility 2, K1, K region                                                           | M58156    | 14972 17 B1       |
| 1443161_at   | 145             | 171             | 191             | 407             | 2.3746        | 0.8467         | 0.4684         | 1.3136               | 4E-07                  | 0.3313               | 3E-05                  | 0.1407 | Figf          | c-fos induced growth factor                                                                  | BM240648  |                   |
| 1438953_at   | 72              | 80              | 80              | 189             | 2.3679        | 0.899          | 0.4219         | 1.1112               | 2E-05                  | 0.4854               | 5E-06                  | 0.4484 | Rbp1          | retinol binding protein 1, cellular                                                          | BB359521  | 14205 X F5        |
| 1448754_at   | 779             | 997             | 1261            | 2356            | 2.3633        | 0.7817         | 0.5355         | 1.619                | 1E-08                  | 0.0051               | 4E-07                  | 4E-05  | Parp14        | poly (ADP-ribose) polymerase family, member 14                                               | NM_011254 | 19659 9 E3.3      |
| 1432548_at   | 33              | 47              | 14              | 111             | 2.3603        | 0.6962         | 0.1221         | 0.4141               | 0.0021                 | 0.3687               | 0.0003                 | 0.1023 | Eif2a         | eukaryotic translation initiation factor 2a                                                  | AK005563  | 547253 16 B3      |
| 1434452_x_at | 423             | 354             | 327             | 835             | 2.3589        | 1.1953         | 0.3912         | 0.7721               | 3E-07                  | 0.1084               | 4E-08                  | 0.0202 | Adamts2       | a disintegrin-like and metalloproteinase (reprolysin type) with thrombospondin type 1 motifs | BG797460  | 229317 3 D        |
| 1457058_at   | 172             | 245             | 254             | 579             | 2.3579        | 0.7003         | 0.4384         | 1.476                | 3E-06                  | 0.0059               | 2E-07                  | 0.0007 | AI646023      | expressed sequence AI646023                                                                  | BM125019  | 216725 11 B1.3    |
| 1456878_at   | 114             | 61              | 84              | 143             | 2.3546        | 1.8822         | 0.5893         | 0.7372               | 8E-05                  | 0.0054               | 2E-05                  | 0.0395 | Nlrp3         | NLR family, pyrin domain containing 3                                                        | BE910952  | 192734 10 C1      |
| 1425412_at   | 75              | 55              | 60              | 130             | 2.3509        | 1.3495         | 0.461          | 0.8031               | 0.0003                 | 0.0721               | 2E-05                  | 0.0538 | Csf1r         | colony stimulating factor 1 receptor                                                         | AF486632  | 216799 11 B1.3    |
| 1419872_at   | 1353            | 919             | 524             | 2160            | 2.35          | 1.4721         | 0.2426         | 0.3873               | 9E-10                  | 4E-06                | 2E-08                  | 1E-06  | Matn2         | matrilin 2                                                                                   | AI323359  | 12978 18 D        |
| 1455978_a_at | 151             | 150             | 123             | 354             | 2.349         | 1.0004         | 0.3477         | 0.8164               | 9E-07                  | 0.9981               | 1E-07                  | 0.2543 | Fabp4         | fatty acid binding protein 4, adipocyte                                                      | BB338441  | 17181 15 B3.3     |
| 1451263_a_at | 126             | 114             | 123             | 267             | 2.3431        | 1.1029         | 0.4591         | 0.9753               | 6E-05                  | 0.4881               | 2E-05                  | 0.8346 | Anxa8         | annexin A8                                                                                   | BC002148  | 11770 3 A1        |
| 1435144_at   | 203             | 151             | 110             | 353             | 2.3408        | 1.3432         | 0.311          | 0.542                | 1E-06                  | 0.0106               | 2E-05                  | 0.0031 | Anxa8         | annexin A8                                                                                   | BM243379  |                   |
| 1425789_s_at | 562             | 509             | 524             | 1190            | 2.3378        | 1.1037         | 0.44           | 0.9321               | 8E-07                  | 0.4563               | 8E-06                  | 0.6184 | Esco2         | establishment of cohesion 1 homolog 2 (S. cerevisiae)                                        | BC013271  | 11752 14 B        |
| 1428304_at   | 73              | 130             | 88              | 303             | 2.3343        | 0.5646         | 0.2905         | 1.2011               | 1E-06                  | 0.0058               | 2E-09                  | 0.2231 | Wnt4          | wingless-related MMTV integration site 4                                                     | AK010391  | 71988 14 D1       |
| 1450782_at   | 173             | 116             | 113             | 271             | 2.3325        | 1.4915         | 0.4177         | 0.6533               | 2E-06                  | 0.0348               | 7E-06                  | 0.0253 | 11Rik         | RIKEN cDNA 9030425E11 gene                                                                   | NM_009523 | 22417 4 D3        |
| 1448251_at   | 241             | 343             | 291             | 800             | 2.3323        | 0.7024         | 0.3635         | 1.0688               | 3E-07                  | 0.0004               | 1E-07                  | 0.0399 | Anxa8         | annexin A8                                                                                   | BG072972  | 71566 9 A5.1      |
| 1417732_at   | 778             | 681             | 738             | 1588            | 2.3321        | 1.1429         | 0.4645         | 0.9478               | 2E-08                  | 0.1786               | 2E-06                  | 0.6229 | Csf1r         | colony stimulating factor 1 receptor                                                         | NM_013473 | 11752 14 B        |
| 1419873_s_at | 552             | 339             | 279             | 789             | 2.329         | 1.631          | 0.3538         | 0.5052               | 2E-08                  | 2E-07                | 1E-06                  | 4E-05  | Shmt1         | serine hydroxymethyltransferase 1 (soluble)                                                  | AI323359  | 12978 18 D        |
| 1422198_a_at | 32              | 101             | 59              | 234             | 2.3244        | 0.318          | 0.2538         | 1.855                | 0.0003                 | 0.0029               | 0.0027                 | 0.1623 |               |                                                                                              | NM_009171 | 20425 11 B2       |

Table S1 - M vs F (WT)

| Probe Set ID | Femal e<br>Cd82-<br>/- | Femal e<br>Cd82<br>+/- | Male<br>Cd82-<br>/- | Male<br>Cd82+<br>/+ | Male<br>Cd82+/-<br>/+ | Female<br>Cd82-/-<br>/- | Female<br>Cd82+/-<br>/+ | Male<br>Cd82-/-<br>/- | Male<br>Cd82+/-<br>/+ | p-value<br>Male<br>Cd82+/-<br>/+ vs<br>Female<br>Cd82+/-<br>/+ | p-value<br>Female<br>Cd82+/-<br>/+ vs<br>Female<br>Cd82-/-<br>/- | p-value<br>Male<br>Cd82+/-<br>/+ vs<br>Male<br>Cd82-/-<br>/- | p-value<br>MFemale<br>e Cd82-/-<br>/- vs<br>Female<br>Cd82-/-<br>/- | Gene                                                                                         | Description | GB     | Entrez Id  | Cytoband |
|--------------|------------------------|------------------------|---------------------|---------------------|-----------------------|-------------------------|-------------------------|-----------------------|-----------------------|----------------------------------------------------------------|------------------------------------------------------------------|--------------------------------------------------------------|---------------------------------------------------------------------|----------------------------------------------------------------------------------------------|-------------|--------|------------|----------|
|              | signal                 | signal                 | signal              | signal              | Ratio                 | Ratio                   | Ratio                   | Ratio                 | Ratio                 | Ratio                                                          | Ratio                                                            | Ratio                                                        | Ratio                                                               |                                                                                              |             |        |            |          |
| 1434639_at   | 115                    | 104                    | 117                 | 241                 | 2.3201                | 1.1111                  | 0.4834                  | 1.0095                | 9E-06                 | 0.4035                                                         | 6E-06                                                            | 0.9316                                                       | Klhl29                                                              | kelch-like 29 (Drosophila)                                                                   | BI988550    | 208439 | 12 A.1.1   |          |
| 1424630_a_at | 36                     | 56                     | 47                  | 130                 | 2.3199                | 0.6487                  | 0.3615                  | 1.2927                | 8E-05                 | 0.0064                                                         | 0.0002                                                           | 0.1786                                                       | Brca1                                                               | breast cancer 1                                                                              | U31625      | 12189  | 11 D       |          |
| 1421074_at   | 99                     | 100                    | 108                 | 233                 | 2.3175                | 0.9877                  | 0.4642                  | 1.0892                | 0.0004                | 0.9422                                                         | 7E-05                                                            | 0.5297                                                       | Cyp7b1                                                              | cytochrome P450, family 7, subfamily b, polypeptide 1                                        | NM_007825   | 13123  | 3 A1       |          |
| 1424613_at   | 214                    | 168                    | 188                 | 388                 | 2.3161                | 1.2756                  | 0.483                   | 0.877                 | 8E-08                 | 0.0442                                                         | 4E-06                                                            | 0.2757                                                       | Gprc5b                                                              | G protein-coupled receptor, family C, group 5, member B                                      | BC020004    | 64297  | 7 F3       |          |
| 1426352_s_at | 71                     | 67                     | 68                  | 155                 | 2.3122                | 1.0634                  | 0.4406                  | 0.9581                | 4E-05                 | 0.6404                                                         | 1E-07                                                            | 0.6192                                                       | Tial1                                                               | Tia1 cytotoxic granule-associated RNA binding protein-like 1                                 | BF731381    | 21843  | 7 F4       |          |
| 1455720_at   | 50                     | 55                     | 55                  | 126                 | 2.3053                | 0.9203                  | 0.4323                  | 1.083                 | 0.0003                | 0.7201                                                         | 0.0018                                                           | 0.759                                                        | Adamts2                                                             | a disintegrin-like and metalloproteinase (reprolysin type) with thrombospondin type 1 motifs | BB477652    | 216725 | 11 B1.3    |          |
| 1422413_at   | 69                     | 49                     | 67                  | 113                 | 2.3044                | 1.4109                  | 0.5943                  | 0.9706                | 0.0015                | 0.1651                                                         | 0.002                                                            | 0.8663                                                       | Cramp11                                                             | Crmp, cramped-like (Drosophila)                                                              | NM_020608   | 57354  | 17 A3.3    |          |
| 1451353_at   | 128                    | 95                     | 67                  | 218                 | 2.3042                | 1.3499                  | 0.3081                  | 0.5259                | 1E-05                 | 0.0312                                                         | 1E-05                                                            | 0.0025                                                       | Tm6sf1                                                              | transmembrane 6 superfamily member 1                                                         | AV378394    | 107769 | 7 D1       |          |
| 1425015_at   | 148                    | 168                    | 159                 | 386                 | 2.2964                | 0.879                   | 0.4116                  | 1.0753                | 2E-05                 | 0.3665                                                         | 2E-07                                                            | 0.5205                                                       | Ephb2                                                               | Eph receptor B2                                                                              | AV221401    | 13844  | 4 D-E      |          |
| 1417821_at   | 377                    | 627                    | 527                 | 1438                | 2.2951                | 0.6008                  | 0.3665                  | 1.3999                | 9E-07                 | 1E-04                                                          | 3E-09                                                            | 0.0002                                                       | D17H6S56E-5                                                         | DNA segment, Chr 17, human D6S56E 5                                                          | NM_033075   | 110956 | 17 B1      |          |
| 1418930_at   | 122                    | 183                    | 111                 | 418                 | 2.2895                | 0.6699                  | 0.2665                  | 0.9109                | 5E-06                 | 0.0074                                                         | 3E-07                                                            | 0.4914                                                       | Cxcl10                                                              | chemokine (C-X-C motif) ligand 10                                                            | NM_021274   | 15945  | 5 E2       |          |
| 1416985_at   | 465                    | 428                    | 309                 | 980                 | 2.2881                | 1.0863                  | 0.3157                  | 0.665                 | 2E-07                 | 0.1127                                                         | 6E-09                                                            | 3E-05                                                        | Sirpa                                                               | signal-regulatory protein alpha                                                              | AB018194    | 19261  | 2 F3       |          |
| 1460069_at   | 89                     | 97                     | 86                  | 221                 | 2.2793                | 0.9194                  | 0.3882                  | 0.9623                | 0.0049                | 0.5981                                                         | 0.0012                                                           | 0.8084                                                       | Smc6                                                                | structural maintenance of chromosomes 6                                                      | BB056038    | 67241  | 12 A2      |          |
| 1423259_at   | 1273                   | 1005                   | 976                 | 2290                | 2.2791                | 1.2668                  | 0.4263                  | 0.767                 | 1E-06                 | 0.0065                                                         | 2E-06                                                            | 0.0116                                                       | Id4                                                                 | inhibitor of DNA binding 4                                                                   | BB121406    | 15904  | 13 B       |          |
| 1450414_at   | 356                    | 215                    | 249                 | 490                 | 2.2775                | 1.6532                  | 0.5077                  | 0.6994                | 9E-06                 | 0.0007                                                         | 1E-06                                                            | 0.0008                                                       | Pdgfrb                                                              | platelet derived growth factor, B polypeptide                                                | BC023427    | 18591  | 15 E       |          |
| 1418250_at   | 80                     | 68                     | 69                  | 153                 | 2.2685                | 1.1792                  | 0.4485                  | 0.8627                | 9E-05                 | 0.2874                                                         | 0.0002                                                           | 0.3702                                                       | Arl4d                                                               | ADP-ribosylation factor-like 4D                                                              | NM_025404   | 80981  | 11 D       |          |
| 1418003_at   | 124                    | 83                     | 118                 | 189                 | 2.2644                | 1.4905                  | 0.6233                  | 0.9469                | 1E-05                 | 0.0051                                                         | 0.0002                                                           | 0.588                                                        | 1190002H23Rik                                                       | RIKEN cDNA 1190002H23 gene                                                                   | NM_025427   | 66214  | 14 D3      |          |
| 1439774_at   | 806                    | 753                    | 775                 | 1703                | 2.2622                | 1.0704                  | 0.455                   | 0.9616                | 6E-08                 | 0.2411                                                         | 1E-08                                                            | 0.4554                                                       | Prrx1                                                               | paired related homeobox 1                                                                    | BB051738    | 18933  | 1 H2.1     |          |
| 1449195_s_at | 176                    | 147                    | 104                 | 333                 | 2.2608                | 1.1901                  | 0.3132                  | 0.5949                | 1E-06                 | 0.0561                                                         | 1E-05                                                            | 0.0059                                                       | Cxcl16                                                              | chemokine (C-X-C motif) ligand 16                                                            | BC019961    | 66102  | 11 B4      |          |
| 1451306_at   | 124                    | 158                    | 130                 | 356                 | 2.2604                | 0.7888                  | 0.3659                  | 1.0486                | 4E-07                 | 0.0421                                                         | 7E-08                                                            | 0.6496                                                       | Cdca71                                                              | cell division cycle associated 7 like                                                        | BC006933    | 217946 | 12 F2      |          |
| 1426604_at   | 59                     | 52                     | 29                  | 117                 | 2.2526                | 1.1454                  | 0.2506                  | 0.4927                | 0.0002                | 0.327                                                          | 0.0002                                                           | 0.0128                                                       | Rnasel                                                              | ribonuclease L (2', 5'-oligoadenylate synthetase-dependent)                                  | BF714880    | 24014  | 1 G2       |          |
| 1428767_at   | 197                    | 186                    | 154                 | 417                 | 2.2418                | 1.0581                  | 0.3699                  | 0.7838                | 1E-05                 | 0.5874                                                         | 4E-08                                                            | 0.0103                                                       | Gsdmd                                                               | gasdermin D                                                                                  | AK007710    | 69146  | 15 D3-E1   |          |
| 1425065_at   | 115                    | 169                    | 73                  | 378                 | 2.2411                | 0.6796                  | 0.1933                  | 0.6374                | 5E-05                 | 0.0551                                                         | 4E-09                                                            | 0.0134                                                       | Oas2                                                                | 2'-5' oligoadenylate synthetase 2                                                            | AB067535    | 246728 | 5 F        |          |
| 1437324_x_at | 141                    | 76                     | 125                 | 171                 | 2.24                  | 1.8559                  | 0.7322                  | 0.8837                | 0.0036                | 0.0121                                                         | 0.0171                                                           | 0.217                                                        | Fmod                                                                | fibromodulin                                                                                 | BB504826    | 14264  | 1 E4       |          |
| 1447927_at   | 75                     | 88                     | 32                  | 197                 | 2.2373                | 0.851                   | 0.1643                  | 0.4318                | 0.0006                | 0.402                                                          | 7E-09                                                            | 9E-05                                                        | Mpa2l                                                               | macrophage activation 2 like                                                                 | BG092512    | 100702 | 5 E5       |          |
| 1437726_x_at | 838                    | 641                    | 387                 | 1432                | 2.2347                | 1.3073                  | 0.2699                  | 0.4613                | 4E-07                 | 0.0007                                                         | 2E-06                                                            | 0.0002                                                       | C1qb                                                                | complement component 1, q subcomponent, beta polypeptide                                     | BB111335    | 12260  | 4 D3       |          |
| 1434470_at   | 207                    | 118                    | 138                 | 264                 | 2.2328                | 1.7511                  | 0.5204                  | 0.6636                | 1E-04                 | 0.003                                                          | 0.0074                                                           | 0.0729                                                       | Syt13                                                               | synaptotagmin XIII                                                                           | BB244585    | 80976  | 2 E1       |          |
| 1451348_at   | 53                     | 55                     | 75                  | 122                 | 2.232                 | 0.9788                  | 0.6126                  | 1.3968                | 5E-05                 | 0.9006                                                         | 0.0091                                                           | 0.1082                                                       | Depdc6                                                              | DEP domain containing 6                                                                      | BC004774    | 97998  | 15 D1      |          |
| 1438676_at   | 52                     | 75                     | 33                  | 168                 | 2.2306                | 0.6912                  | 0.1985                  | 0.6406                | 0.0003                | 0.009                                                          | 2E-07                                                            | 0.0018                                                       | Mpa2l                                                               | macrophage activation 2 like                                                                 | BM241485    | 100702 | 5 E5       |          |
| 1422190_at   | 111                    | 99                     | 59                  | 222                 | 2.23                  | 1.1128                  | 0.2679                  | 0.5368                | 4E-05                 | 0.4072                                                         | 2E-05                                                            | 0.0056                                                       | C5ar1                                                               | complement component 5a receptor 1                                                           | NM_007577   | 12273  | 7 A2       |          |
| 1426324_at   | 352                    | 470                    | 251                 | 1048                | 2.229                 | 0.7483                  | 0.2396                  | 0.7139                | 4E-06                 | 0.0212                                                         | 5E-11                                                            | 0.0013                                                       | H2-K1                                                               | histocompatibility 2, K1, K region                                                           | M33151      | 14972  | 17 B1      |          |
| 1437716_x_at | 1397                   | 2188                   | 1580                | 4876                | 2.2288                | 0.6387                  | 0.324                   | 1.1306                | 8E-06                 | 5E-05                                                          | 1E-08                                                            | 0.0064                                                       | Kif22                                                               | kinesin family member 22                                                                     | BB251322    | 110033 | 7 F3       |          |
| 1455899_x_at | 239                    | 215                    | 239                 | 480                 | 2.2266                | 1.1111                  | 0.4985                  | 0.9988                | 0.0001                | 0.5139                                                         | 0.0001                                                           | 0.9937                                                       | Socs3                                                               | suppressor of cytokine signaling 3                                                           | BB241535    | 12702  | 11 E2      |          |
| 1418271_at   | 158                    | 144                    | 135                 | 321                 | 2.2246                | 1.0954                  | 0.4206                  | 0.8542                | 1E-06                 | 0.2114                                                         | 8E-08                                                            | 0.0293                                                       | Bhlhb5                                                              | basic helix-loop-helix domain containing, class B5                                           | NM_021560   | 59058  |            |          |
| 1416326_at   | 487                    | 569                    | 684                 | 1260                | 2.2146                | 0.8553                  | 0.543                   | 1.4059                | 4E-07                 | 0.0385                                                         | 0.0001                                                           | 0.0071                                                       | Crip1                                                               | cysteine-rich protein 1 (intestinal)                                                         | NM_007763   | 12925  | 12 F1      |          |
| 1451939_a_at | 140                    | 165                    | 153                 | 366                 | 2.2125                | 0.8445                  | 0.417                   | 1.0925                | 8E-05                 | 0.1995                                                         | 4E-07                                                            | 0.301                                                        | Srxp                                                                | sushi-repeat-containing protein                                                              | AB028050    | 51795  | X A1.2     |          |
| 1451904_a_at | 72                     | 81                     | 72                  | 178                 | 2.2101                | 0.8918                  | 0.4065                  | 1.0074                | 0.0002                | 0.2042                                                         | 0.0002                                                           | 0.9573                                                       | Adam33                                                              | a disintegrin and metalloproteinase domain 33                                                | AB059633    | 110751 | 2 F1       |          |
| 1436425_at   | 142                    | 95                     | 99                  | 210                 | 2.2091                | 1.4953                  | 0.47                    | 0.6944                | 0.0015                | 0.0072                                                         | 0.0008                                                           | 0.0066                                                       | Kank4                                                               | KN motif and ankyrin repeat domains 4                                                        | BB486252    | 242553 | 4 C6       |          |
| 1456077_x_at | 56                     | 93                     | 73                  | 205                 | 2.2088                | 0.6074                  | 0.3563                  | 1.2958                | 7E-05                 | 0.0094                                                         | 2E-06                                                            | 0.093                                                        | Cdc25c                                                              | cell division cycle 25 homolog C (S. pombe)                                                  | BB209183    | 12532  | 18 B1      |          |
| 1420097_at   | 98                     | 138                    | 197                 | 305                 | 2.2082                | 0.7074                  | 0.645                   | 2.0134                | 0.0024                | 0.0921                                                         | 0.0729                                                           | 0.0085                                                       | D13Erd787e                                                          | DNA segment, Chr 13, ERATO Doi 787, expressed                                                | AU020421    | 52680  | 13 29.0 cM |          |
| 1423975_s_at | 518                    | 540                    | 741                 | 1190                | 2.205                 | 0.9597                  | 0.6225                  | 1.4304                | 2E-09                 | 0.149                                                          | 0.0091                                                           | 0.0339                                                       | Numa1                                                               | nuclear mitotic apparatus protein 1                                                          | BC006631    | 101706 | 7 E3       |          |
| 1435193_at   | 109                    | 168                    | 88                  | 370                 | 2.2027                | 0.6477                  | 0.2375                  | 0.8077                | 0.0002                | 0.0185                                                         | 2E-08                                                            | 0.0902                                                       | A230050P20Rik                                                       | RIKEN cDNA A230050P20 gene                                                                   | BB085904    | 319278 | 9 A3       |          |
| 1415983_at   | 750                    | 535                    | 390                 | 1178                | 2.202                 | 1.4024                  | 0.3308                  | 0.5194                | 4E-07                 | 0.0003                                                         | 7E-07                                                            | 7E-05                                                        | Lcp1                                                                | lymphocyte cytosolic protein 1                                                               | NM_008879   | 18826  | 14 D3      |          |
| 1425548_a_at | 152                    | 150                    | 89                  | 330                 | 2.1989                | 1.0126                  | 0.2702                  | 0.5868                | 3E-07                 | 0.9106                                                         | 5E-08                                                            | 0.0015                                                       | Lst1                                                                | leukocyte specific transcript 1                                                              | U72644      | 16988  | 17 B1      |          |
| 1424754_at   | 1220                   | 1110                   | 728                 | 2441                | 2.1988                | 1.0993                  | 0.2981                  | 0.5963                | 7E-09                 | 0.0567                                                         | 2E-07                                                            | 0.0003                                                       | Ms4a7                                                               | membrane-spanning 4-domains, subfamily A, member 7                                           | BC024402    | 109225 | 19 A       |          |
| 1451655_at   | 82                     | 110                    | 52                  | 241                 | 2.1981                | 0.7468                  | 0.2161                  | 0.636                 | 0.0007                | 0.1168                                                         | 7E-07                                                            | 0.0132                                                       | Sfn8                                                                | schlafen 8                                                                                   | BC024709    | 276950 | 11 C       |          |
| 1438441_at   | 133                    | 96                     | 87                  | 210                 | 2.1973                | 1.3946                  | 0.4128                  | 0.6505                | 0.0001                | 0.0307                                                         | 7E-07                                                            | 0.0007                                                       | Id4                                                                 | inhibitor of DNA binding 4                                                                   | AI323288    | 15904  | 13 B       |          |
| 1442471_at   | 80                     | 109                    | 108                 | 240                 | 2.1968                | 0.7293                  | 0.45                    | 1.3554                | 4E-07                 | 0.0248                                                         | 3E-06                                                            | 0.0351                                                       |                                                                     |                                                                                              | BG060522    |        |            |          |
| 1456212_x_at | 311                    | 221                    | 252                 | 485                 | 2.1936                | 1.4077                  | 0.5192                  | 0.8091                | 5E-05                 | 0.0063                                                         | 2E-05                                                            | 0.0175                                                       | Socs3                                                               | suppressor of cytokine signaling 3                                                           | BB831725    | 12702  | 11 E2      |          |
| 1438027_at   | 76                     | 64                     | 34                  | 140                 | 2.1867                | 1.1849                  | 0.2444                  | 0.4511                | 0.0035                | 0.3603                                                         | 1E-07                                                            | 2E-07                                                        |                                                                     |                                                                                              | BB668084    |        |            |          |
| 1435670_at   | 120                    | 84                     | 92                  | 185                 | 2.1859                | 1.416                   | 0.4964                  | 0.7663                | 2E-05                 | 0.1319                                                         | 0.0002                                                           | 0.2345                                                       | Tcfap2b                                                             | transcription factor AP-2 beta                                                               | AV237028    | 21419  | 1 A2-A4    |          |
| 1442884_at   | 22                     | 58                     | 44                  | 126                 | 2.1839                | 0.3756                  | 0.3463                  | 2.0137                | 1E-04                 | 0.0318                                                         | 0.0007                                                           | 0.1092                                                       | Hgf                                                                 | hepatocyte growth factor                                                                     | BB476818    | 15234  | 5 4.0 cM   |          |
| 1418340_at   | 754                    | 572                    | 369                 | 1248                | 2.1831                | 1.3183                  | 0.2956                  | 0.4895                | 1E-08                 | 0.0023                                                         | 1E-06                                                            | 0.0003                                                       | Fcer1g                                                              | Fc receptor, IgE, high affinity I, gamma polypeptide                                         | NM_010185   | 14127  | 1 H3       |          |
| 1427126_at   | 935                    | 1028                   | 1113                | 2244                | 2.183                 | 0.9093                  | 0.4959                  | 1.1905                | 1E-05                 | 0.3012                                                         | 8E-05                                                            | 0.1322                                                       | Hspa1b                                                              | heat shock protein 1B                                                                        | M12573      | 15511  | 17 B1      |          |
| 1453837_at   | 75                     | 64                     | 65                  | 140                 | 2.1812                | 1.1625                  | 0.4603                  | 0.8637                | 0.0065                | 0.5356                                                         | 0.0048                                                           | 0.5308                                                       | 6330500D04Rik                                                       | RIKEN cDNA 6330500D04 gene                                                                   | BB867666    | 193385 | 13 A3.2    |          |
| 1452250_a_at | 1757                   | 2416                   | 2221                | 5269                | 2.1811                | 0.7273                  | 0.4216                  | 1.2643                | 7E-07                 | 0.0073                                                         | 8E-08                                                            | 0.0226                                                       | Col6a2                                                              | collagen, type VI, alpha 2                                                                   | BI455189    | 12834  | 10 41.1 cM |          |

Table S1 - M vs F (WT)

| Probe Set ID | Female<br>Cd82-<br>/- | Female<br>Cd82<br>+/+ | Male<br>Cd82-<br>/- | Male<br>Cd82+<br>+/ | Male<br>Cd82+/-<br>/+ | Female<br>Cd82+/-<br>/+ | Male<br>Cd82+/-<br>/+ | Male<br>Cd82+/-<br>/+ | p-value<br>Male<br>Cd82+/-<br>/+ vs<br>Female<br>Cd82+/-<br>/+ | p-value<br>Female<br>Cd82+/-<br>/+ vs<br>Female<br>Cd82+/-<br>/+ | p-value<br>Male<br>Cd82+/-<br>/+ vs<br>Male<br>Cd82+/-<br>/+ | p-value<br>MFemale<br>Cd82+/-<br>/+ vs<br>Female<br>Cd82+/-<br>/+ | Gene          | Description                                                         | GB        | Entrez Id | Cytoband    |
|--------------|-----------------------|-----------------------|---------------------|---------------------|-----------------------|-------------------------|-----------------------|-----------------------|----------------------------------------------------------------|------------------------------------------------------------------|--------------------------------------------------------------|-------------------------------------------------------------------|---------------|---------------------------------------------------------------------|-----------|-----------|-------------|
|              | signal                | signal                | signal              | signal              | Ratio                 | Ratio                   | Ratio                 | Ratio                 | Ratio                                                          | Ratio                                                            | Ratio                                                        | Ratio                                                             |               |                                                                     |           |           |             |
| 1439015_at   | 300                   | 390                   | 366                 | 849                 | 2.1806                | 0.7696                  | 0.4312                | 1.2217                | 5E-07                                                          | 0.0787                                                           | 1E-10                                                        | 0.0989                                                            | Gfra1         | glial cell line derived neurotrophic factor family receptor alpha 1 | AV221299  | 14585     | 19 D2-D3    |
| 1452426_x_at | 131                   | 154                   | 131                 | 336                 | 2.1795                | 0.8497                  | 0.3902                | 1.0009                | 1E-06                                                          | 0.3172                                                           | 9E-08                                                        | 0.9951                                                            |               |                                                                     | BC004065  |           |             |
| 1458802_at   | 142                   | 204                   | 165                 | 445                 | 2.179                 | 0.6945                  | 0.3697                | 1.1601                | 3E-08                                                          | 0.002                                                            | 1E-11                                                        | 0.064                                                             | Hivep3        | human immunodeficiency virus type I enhancer binding protein        | BB164127  | 16656     | 4 D1        |
| 1427754_a_at | 55                    | 77                    | 79                  | 168                 | 2.1787                | 0.708                   | 0.4672                | 1.4377                | 4E-05                                                          | 0.0348                                                           | 7E-06                                                        | 0.014                                                             | Dnm1          | dynamin 1                                                           | L29457    | 13429     | 2 B         |
| 1423593_a_at | 384                   | 269                   | 226                 | 584                 | 2.1731                | 1.4299                  | 0.387                 | 0.5882                | 3E-05                                                          | 0.0036                                                           | 7E-08                                                        | 4E-06                                                             | Csf1r         | colony stimulating factor 1 receptor                                | AK004947  | 12978     | 18 D        |
| 1417822_at   | 497                   | 804                   | 705                 | 1746                | 2.1717                | 0.6184                  | 0.4039                | 1.4183                | 3E-07                                                          | 3E-05                                                            | 4E-09                                                        | 6E-05                                                             | D17H6S56E-5   | DNA segment, Chr 17, human D6S56E 5                                 | NM_033075 | 110956    | 17 B1       |
| 1455961_at   | 122                   | 69                    | 76                  | 150                 | 2.1715                | 1.7617                  | 0.5072                | 0.6252                | 7E-05                                                          | 0.0029                                                           | 4E-05                                                        | 0.0034                                                            |               |                                                                     | AV174022  |           |             |
| 1441333_at   | 46                    | 47                    | 43                  | 102                 | 2.17                  | 0.9689                  | 0.416                 | 0.9317                | 1E-07                                                          | 0.8315                                                           | 0.0009                                                       | 0.7596                                                            |               |                                                                     | BB485544  |           |             |
| 1454159_a_at | 12775                 | 7709                  | 7799                | 16699               | 2.1661                | 1.6572                  | 0.467                 | 0.6105                | 5E-11                                                          | 0.0039                                                           | 3E-08                                                        | 0.0031                                                            | Igfbp2        | insulin-like growth factor binding protein 2                        | AK011784  | 16008     | 1 C3        |
| 1419397_at   | 235                   | 397                   | 294                 | 859                 | 2.1657                | 0.5922                  | 0.3423                | 1.2517                | 3E-08                                                          | 2E-06                                                            | 2E-09                                                        | 0.0027                                                            | Pola1         | polymerase (DNA directed), alpha 1                                  | NM_008892 | 18968     | X C-D       |
| 1419603_at   | 185                   | 235                   | 91                  | 508                 | 2.1654                | 0.7872                  | 0.1797                | 0.4943                | 9E-06                                                          | 0.0764                                                           | 1E-06                                                        | 0.003                                                             | Ifi204        | interferon activated gene 204                                       | NM_008329 | 15951     | 1 H3        |
| 1442101_at   | 201                   | 68                    | 106                 | 147                 | 2.1643                | 2.9662                  | 0.7241                | 0.5283                | 3E-05                                                          | 2E-05                                                            | 0.0014                                                       | 0.0002                                                            | Elf1          | leucine rich repeat and fibronectin type III, extracellular 1       | BB279531  | 243312    | 5 G2        |
| 1415999_at   | 196                   | 164                   | 176                 | 353                 | 2.1609                | 1.1996                  | 0.4969                | 0.895                 | 1E-06                                                          | 0.0111                                                           | 3E-07                                                        | 0.0553                                                            | Hey1          | hair/enhancer-of-split related with YRPW motif 1                    | NM_010423 | 15213     | 3 A1        |
| 1437313_x_at | 535                   | 895                   | 601                 | 1933                | 2.1609                | 0.5982                  | 0.3111                | 1.1239                | 9E-06                                                          | 0.0002                                                           | 4E-07                                                        | 0.265                                                             | Hmgb2         | high mobility group box 2                                           | C85885    | 97165     | 8 B2        |
| 1435504_at   | 62                    | 49                    | 56                  | 105                 | 2.1605                | 1.2678                  | 0.5297                | 0.9027                | 1E-05                                                          | 0.0387                                                           | 9E-05                                                        | 0.3666                                                            | Clp4          | CAP-GLY domain containing linker protein family, member 4           | BM217861  | 78785     | 17 E2       |
| 1423252_at   | 129                   | 155                   | 134                 | 335                 | 2.1581                | 0.829                   | 0.3999                | 1.0411                | 7E-08                                                          | 0.0737                                                           | 5E-06                                                        | 0.7551                                                            | Hdgfrp3       | hepatoma-derived growth factor, related protein 3                   | BB291880  | 29877     | 7 D3        |
| 1433930_at   | 45                    | 53                    | 56                  | 115                 | 2.1579                | 0.8429                  | 0.4842                | 1.2397                | 0.0017                                                         | 0.5041                                                           | 0.0006                                                       | 0.3389                                                            | Hpse          | heparanase                                                          | BG094050  | 15442     | 5 E4        |
| 1455269_a_at | 173                   | 114                   | 111                 | 246                 | 2.1564                | 1.5137                  | 0.4501                | 0.6411                | 2E-07                                                          | 0.0005                                                           | 0.0122                                                       | 0.5011                                                            | Coro1a        | coronin, actin binding protein 1A                                   | BB740218  | 12721     | 7 F3        |
| 1425527_at   | 778                   | 814                   | 826                 | 1755                | 2.1551                | 0.9548                  | 0.4704                | 1.0618                | 3E-06                                                          | 0.4407                                                           | 2E-06                                                        | 0.3605                                                            | Prrx1         | paired related homeobox 1                                           | L06502    | 18933     | 1 H2.1      |
| 1418454_at   | 614                   | 644                   | 729                 | 1388                | 2.154                 | 0.9526                  | 0.5252                | 1.1876                | 9E-09                                                          | 0.4781                                                           | 5E-08                                                        | 0.0257                                                            | Mfap5         | microfibrillar associated protein 5                                 | NM_015776 | 50530     | 6 F1        |
| 1449699_s_at | 285                   | 456                   | 364                 | 982                 | 2.1537                | 0.6251                  | 0.3706                | 1.2771                | 1E-06                                                          | 0.0005                                                           | 2E-08                                                        | 0.0139                                                            | C330027C09Rik | RIKEN cDNA C330027C09 gene                                          | AU018569  | 22471     | 16 B5       |
| 1418718_at   | 335                   | 251                   | 213                 | 540                 | 2.1473                | 1.334                   | 0.3944                | 0.6349                | 1E-06                                                          | 0.0031                                                           | 4E-07                                                        | 0.0003                                                            | Cxcl16        | chemokine (C-X-C motif) ligand 16                                   | BC019961  | 66102     | 11 B4       |
| 1450020_at   | 209                   | 119                   | 79                  | 255                 | 2.1461                | 1.7563                  | 0.3079                | 0.3762                | 4E-05                                                          | 0.0036                                                           | 6E-08                                                        | 1E-05                                                             | Cx3cr1        | chemokine (C-X3-C) receptor 1                                       | BC012653  | 13051     | 9 F4        |
| 1415802_at   | 755                   | 1069                  | 864                 | 2292                | 2.145                 | 0.7062                  | 0.3771                | 1.1453                | 7E-08                                                          | 2E-05                                                            | 2E-09                                                        | 0.0128                                                            | Slc16a1       | solute carrier family 16 (monocarboxylic acid transporters), men    | NM_009196 | 20501     | 3 F.2       |
| 1419905_s_at | 92                    | 55                    | 50                  | 117                 | 2.1411                | 1.6758                  | 0.4302                | 0.5497                | 0.0011                                                         | 0.0207                                                           | 1E-05                                                        | 0.0011                                                            | Hpgd          | hydroxyprostaglandin dehydrogenase 15 (NAD)                         | AV026552  | 15446     | 8 B3.2      |
| 1427086_at   | 569                   | 328                   | 470                 | 701                 | 2.1399                | 1.7374                  | 0.6698                | 0.825                 | 5E-06                                                          | 0.0003                                                           | 0.0009                                                       | 0.0857                                                            | Slit3         | slit homolog 3 (Drosophila)                                         | BM570006  | 20564     |             |
| 1443968_at   | 23                    | 79                    | 56                  | 169                 | 2.1397                | 0.2976                  | 0.3295                | 2.3694                | 0.0033                                                         | 0.0272                                                           | 4E-05                                                        | 0.0618                                                            | Adarb1        | adenosine deaminase, RNA-specific, B1                               | BI202667  | 110532    | 10 41.4 cM  |
| 1421991_a_at | 373                   | 519                   | 429                 | 1109                | 2.1373                | 0.7182                  | 0.387                 | 1.1515                | 4E-07                                                          | 0.0004                                                           | 2E-06                                                        | 0.1844                                                            | Igfbp4        | insulin-like growth factor binding protein 4                        | NM_010517 | 16010     | 11 D        |
| 1449401_at   | 1170                  | 964                   | 523                 | 2061                | 2.1373                | 1.2137                  | 0.2536                | 0.4466                | 2E-10                                                          | 0.0007                                                           | 8E-08                                                        | 1E-05                                                             | C1qc          | complement component 1, q subcomponent, C chain                     | NM_007574 | 12262     | 4 D3        |
| 1418167_at   | 57                    | 100                   | 83                  | 213                 | 2.1317                | 0.5669                  | 0.3892                | 1.4637                | 4E-06                                                          | 0.0039                                                           | 5E-07                                                        | 0.0219                                                            | Tcfap4        | transcription factor AP4                                            | NM_031182 | 83383     | 16 A1       |
| 1423804_a_at | 434                   | 532                   | 531                 | 1132                | 2.1303                | 0.8166                  | 0.4692                | 1.2239                | 2E-06                                                          | 0.0312                                                           | 7E-06                                                        | 0.0601                                                            | Idi1          | isopentenyl-diphosphate delta isomerase                             | BC004801  | 319554    | 13 A1       |
| 1438081_at   | 164                   | 184                   | 155                 | 391                 | 2.1257                | 0.8927                  | 0.3958                | 0.9425                | 2E-06                                                          | 0.1101                                                           | 2E-05                                                        | 0.6285                                                            | Mcc           | mutated in colorectal cancers                                       | BB794635  | 328949    | 18 B3       |
| 1417926_at   | 433                   | 672                   | 494                 | 1428                | 2.1251                | 0.6448                  | 0.346                 | 1.1403                | 4E-08                                                          | 7E-06                                                            | 2E-09                                                        | 0.0378                                                            | Ncapg2        | non-SMC condensin II complex, subunit G2                            | NM_133762 | 76044     | 12 F2       |
| 1421106_at   | 207                   | 209                   | 208                 | 444                 | 2.1239                | 0.9931                  | 0.4689                | 1.0028                | 0.0002                                                         | 0.9591                                                           | 8E-05                                                        | 0.9826                                                            | Jag1          | jagged 1                                                            | AA880220  | 16449     | 2 F3        |
| 1416710_at   | 122                   | 58                    | 65                  | 122                 | 2.12                  | 1.2102                  | 0.5324                | 0.5324                | 0.0018                                                         | 0.0008                                                           | 0.0151                                                       | 0.011                                                             | Tmem35        | transmembrane protein 35                                            | NM_026239 | 67564     | X E3        |
| 1453214_at   | 758                   | 1012                  | 895                 | 2143                | 2.1182                | 0.7494                  | 0.4175                | 1.1802                | 1E-05                                                          | 0.0146                                                           | 4E-06                                                        | 0.1341                                                            | Lrrc15        | leucine rich repeat containing 15                                   | AK017350  | 74488     | 16 B2       |
| 1439345_at   | 94                    | 63                    | 58                  | 133                 | 2.1168                | 1.5059                  | 0.4386                | 0.6165                | 0.0001                                                         | 0.0087                                                           | 1E-05                                                        | 0.001                                                             | Gpnmb         | glycoprotein (transmembrane) nmb                                    | BB113177  | 93695     | 6 B2.3      |
| 1456359_at   | 113                   | 127                   | 112                 | 268                 | 2.1159                | 0.8939                  | 0.4181                | 0.9896                | 0.0008                                                         | 0.5311                                                           | 0.0006                                                       | 0.9575                                                            | Ppwd1         | peptidylprolyl isomerase domain and WD repeat containing 1          | AV233215  | 238831    | 13 D1       |
| 1423974_at   | 441                   | 447                   | 607                 | 946                 | 2.1156                | 0.9855                  | 0.641                 | 1.3762                | 6E-10                                                          | 0.8121                                                           | 0.0038                                                       | 0.0316                                                            | Numa1         | nuclear mitotic apparatus protein 1                                 | BC006631  | 101706    | 7 E3        |
| 1421038_a_at | 49                    | 93                    | 84                  | 197                 | 2.1153                | 0.5261                  | 0.4256                | 1.7112                | 6E-06                                                          | 4E-05                                                            | 1E-07                                                        | 2E-05                                                             | Kcnn4         | potassium intermediate/small conductance calcium-activated ch       | NM_008433 | 16534     | 7 A3        |
| 1448160_at   | 387                   | 316                   | 197                 | 667                 | 2.1129                | 1.2248                  | 0.2958                | 0.5103                | 2E-10                                                          | 0.0024                                                           | 2E-07                                                        | 7E-05                                                             | Lcp1          | lymphocyte cytosolic protein 1                                      | NM_008879 | 18826     | 14 D3       |
| 1415864_at   | 910                   | 620                   | 658                 | 1309                | 2.111                 | 1.4674                  | 0.5027                | 0.7232                | 6E-06                                                          | 0.0194                                                           | 2E-05                                                        | 0.0359                                                            | Bpgm          | 2,3-bisphosphoglycerate mutase                                      | NM_007563 | 12183     | 6 B1        |
| 1460365_a_at | 399                   | 471                   | 437                 | 993                 | 2.1088                | 0.848                   | 0.4397                | 1.0935                | 7E-07                                                          | 0.0962                                                           | 1E-05                                                        | 0.4624                                                            | Dnm1          | dynamin 1                                                           | L31397    | 13429     | 2 B         |
| 1426906_at   | 213                   | 264                   | 121                 | 556                 | 2.1059                | 0.8079                  | 0.217                 | 0.5656                | 3E-05                                                          | 0.0388                                                           | 2E-08                                                        | 9E-05                                                             | Ifi205        | interferon activated gene 205                                       | M74124    | 226695    | 1 H3        |
| 1448250_at   | 291                   | 433                   | 412                 | 910                 | 2.1018                | 0.6727                  | 0.4529                | 1.415                 | 8E-09                                                          | 2E-05                                                            | 8E-09                                                        | 8E-05                                                             | 9030425E11Rik | RIKEN cDNA 9030425E11 gene                                          | BG072972  | 71566     | 9 A5.1      |
| 1419627_s_at | 68                    | 57                    | 55                  | 120                 | 2.1005                | 1.1783                  | 0.4561                | 0.813                 | 0.0015                                                         | 0.3281                                                           | 0.0002                                                       | 0.1434                                                            | Clec4n        | C-type lectin domain family 4, member n                             | NM_020001 | 56620     | 6 F3        |
| 1437939_s_at | 129                   | 90                    | 85                  | 188                 | 2.1003                | 1.4394                  | 0.4546                | 0.6633                | 1E-05                                                          | 0.0017                                                           | 1E-06                                                        | 0.0003                                                            | Ctsc          | cathepsin C                                                         | BM237633  | 13032     | 7 D3-E.1    |
| 1426258_at   | 167                   | 64                    | 87                  | 135                 | 2.0974                | 2.5897                  | 0.6442                | 0.5218                | 7E-05                                                          | 0.0004                                                           | 0.0006                                                       | 0.0015                                                            | Sor11         | sortilin-related receptor, LDLR class A repeats-containing          | BI648081  | 20660     |             |
| 1424965_at   | 217                   | 195                   | 111                 | 409                 | 2.0967                | 1.1142                  | 0.2712                | 0.5103                | 3E-06                                                          | 0.1255                                                           | 9E-06                                                        | 0.0014                                                            | Lpxn          | leupaxin                                                            | BC026563  | 107321    | 19 A        |
| 1459552_at   | 89                    | 58                    | 79                  | 121                 | 2.096                 | 1.5293                  | 0.6508                | 0.8919                | 0.0007                                                         | 0.0248                                                           | 0.0578                                                       | 0.5942                                                            |               |                                                                     | BB404047  |           |             |
| 1450440_at   | 102                   | 123                   | 106                 | 257                 | 2.0924                | 0.8291                  | 0.4126                | 1.0413                | 1E-08                                                          | 0.1173                                                           | 1E-07                                                        | 0.7301                                                            | Gfra1         | glial cell line derived neurotrophic factor family receptor alpha 1 | BE534815  | 14585     | 19 D2-D3    |
| 1417063_at   | 1451                  | 1121                  | 625                 | 2342                | 2.0894                | 1.2947                  | 0.2671                | 0.431                 | 7E-09                                                          | 0.0006                                                           | 5E-07                                                        | 4E-05                                                             | C1qb          | complement component 1, q subcomponent, beta polypeptide            | NM_009777 | 12260     | 4 D3        |
| 1448119_at   | 551                   | 350                   | 406                 | 731                 | 2.0877                | 1.5715                  | 0.5546                | 0.7368                | 5E-07                                                          | 0.0013                                                           | 1E-05                                                        | 0.015                                                             | Bpgm          | 2,3-bisphosphoglycerate mutase                                      | NM_007563 | 12183     | 6 B1        |
| 1451161_a_at | 540                   | 437                   | 270                 | 912                 | 2.0869                | 1.2357                  | 0.2959                | 0.4997                | 9E-11                                                          | 0.0029                                                           | 1E-07                                                        | 4E-05                                                             | Emr1          | EGF-like module containing, mucin-like, hormone receptor-like s     | U66888    | 13733     | 17 D        |
| 1416986_a_at | 150                   | 152                   | 101                 | 316                 | 2.085                 | 0.991                   | 0.3181                | 0.6691                | 6E-07                                                          | 0.8572                                                           | 1E-06                                                        | 0.0034                                                            | Sirpa         | signal-regulatory protein alpha                                     | AB018194  | 19261     | 2 F3        |
| 1451931_x_at | 3153                  | 3705                  | 2114                | 7718                | 2.0833                | 0.8511                  | 0.274                 | 0.6706                | 7E-06                                                          | 0.0864                                                           | 1E-08                                                        | 0.0006                                                            | H2-L          | histocompatibility 2, D region                                      | M69068    | 14980     | 17.19.13 cM |

Table S1 - M vs F (WT)

| Probe Set ID | Femal<br>e<br>Cd82-<br>/-<br>avera<br>ge<br>signal | Femal<br>e<br>Cd82<br>+/+<br>avera<br>ge<br>signal | Male<br>Cd82-<br>/-<br>avera<br>ge<br>signal | Male<br>Cd82+<br>/+<br>avera<br>ge<br>signal | Male<br>Cd82+/<br>/+<br>Ratio | Female<br>Cd82-/<br>/-<br>Ratio | Male<br>Cd82-/<br>/+<br>Ratio | Male<br>Cd82-/<br>/+<br>Ratio | p-value<br>Male<br>Cd82+/<br>/+<br>vs<br>Female<br>Cd82+/<br>/+ | p-value<br>Female<br>Cd82+/<br>/+<br>vs<br>Female<br>Cd82-/<br>/- | p-value<br>Male<br>Cd82+/<br>/+<br>vs<br>Male<br>Cd82-/<br>/- | p-value<br>MFemale<br>Cd82-/<br>/-<br>vs<br>Female<br>Cd82-/<br>/- | Gene          | Description                                                     | GB                       | Entrez Id | Cytoband  |
|--------------|----------------------------------------------------|----------------------------------------------------|----------------------------------------------|----------------------------------------------|-------------------------------|---------------------------------|-------------------------------|-------------------------------|-----------------------------------------------------------------|-------------------------------------------------------------------|---------------------------------------------------------------|--------------------------------------------------------------------|---------------|-----------------------------------------------------------------|--------------------------|-----------|-----------|
|              | 1420559_a_at                                       | 81                                                 | 96                                           | 102                                          | 200                           | 2.0823                          | 0.8431                        | 0.5092                        | 1.2578                                                          | 0.0003                                                            | 0.4174                                                        | 0.0026                                                             | 0.3212        | Shox2                                                           | short stature homeobox 2 | NM_013665 | 20429     |
| 1450678_at   | 331                                                | 276                                                | 185                                          | 574                                          | 2.0797                        | 1.1989                          | 0.3213                        | 0.5574                        | 8E-07                                                           | 0.0638                                                            | 6E-07                                                         | 0.0005                                                             | Itgb2         | integrin beta 2                                                 | NM_008404                | 16414     | 10 C1     |
| 1431213_a_at | 266                                                | 283                                                | 287                                          | 588                                          | 2.0754                        | 0.9391                          | 0.4889                        | 1.0805                        | 7E-06                                                           | 0.4834                                                            | 6E-07                                                         | 0.2993                                                             | LOC67527      | murine leukemia retrovirus                                      | BG297038                 | 67527     | 18 B1     |
| 1442287_at   | 32                                                 | 50                                                 | 49                                           | 104                                          | 2.0725                        | 0.6397                          | 0.4759                        | 1.5419                        | 0.0009                                                          | 0.3019                                                            | 0.001                                                         | 0.2796                                                             |               |                                                                 | BB483068                 |           |           |
| 1419703_at   | 866                                                | 1321                                               | 1192                                         | 2736                                         | 2.0718                        | 0.6556                          | 0.4356                        | 1.3764                        | 3E-05                                                           | 0.0007                                                            | 5E-06                                                         | 0.0042                                                             | Col5a3        | collagen, type V, alpha 3                                       | NM_016919                | 53867     | 9 A3      |
| 1420768_a_at | 35                                                 | 58                                                 | 18                                           | 120                                          | 2.0707                        | 0.6047                          | 0.1498                        | 0.5131                        | 0.002                                                           | 0.0286                                                            | 0.0005                                                        | 0.1104                                                             | Dhx58         | DEXH (Asp-Glu-X-His) box polypeptide 58                         | NM_030150                | 80861     | 11 D      |
| 1417019_a_at | 169                                                | 331                                                | 242                                          | 685                                          | 2.0691                        | 0.5103                          | 0.3535                        | 1.4335                        | 2E-07                                                           | 1E-06                                                             | 6E-09                                                         | 0.0002                                                             | Cdc6          | cell division cycle 6 homolog (S. cerevisiae)                   | NM_011799                | 23834     | 11 D      |
| 1448950_at   | 86                                                 | 164                                                | 140                                          | 339                                          | 2.0651                        | 0.5212                          | 0.4131                        | 1.6369                        | 6E-05                                                           | 0.0136                                                            | 1E-05                                                         | 0.0336                                                             | Il1r1         | interleukin 1 receptor, type I                                  | NM_008362                | 16177     | 1 B       |
| 1451767_at   | 111                                                | 90                                                 | 44                                           | 185                                          | 2.0636                        | 1.2419                          | 0.2372                        | 0.3941                        | 0.0001                                                          | 0.1178                                                            | 0.0052                                                        | 0.0457                                                             | Ncf1          | neutrophil cytosolic factor 1                                   | BE370703                 | 17969     | 5 G2      |
| 1421792_s_at | 233                                                | 190                                                | 72                                           | 391                                          | 2.0628                        | 1.2257                          | 0.1831                        | 0.3082                        | 4E-05                                                           | 0.0526                                                            | 0.0003                                                        | 0.0035                                                             | Trem2         | triggering receptor expressed on myeloid cells 2                | NM_031254                | 83433     | 17 C      |
| 1427017_at   | 148                                                | 164                                                | 148                                          | 339                                          | 2.0612                        | 0.9014                          | 0.4381                        | 1.0018                        | 9E-07                                                           | 0.1698                                                            | 5E-08                                                         | 0.9787                                                             | Satb2         | special AT-rich sequence binding protein 2                      | BB104560                 | 212712    | 1 C1.3    |
| 1458299_s_at | 122                                                | 121                                                | 133                                          | 248                                          | 2.0598                        | 1.0122                          | 0.5353                        | 1.0893                        | 9E-09                                                           | 0.8866                                                            | 1E-06                                                         | 0.3687                                                             | Nfkbie        | nuclear factor of kappa light polypeptide gene enhancer in B-ce | BB820441                 | 18037     | 17 C      |
| 1415865_s_at | 1012                                               | 651                                                | 735                                          | 1340                                         | 2.0585                        | 1.5544                          | 0.5488                        | 0.7268                        | 2E-07                                                           | 0.0007                                                            | 1E-07                                                         | 0.0023                                                             | Bpgm          | 2,3-bisphosphoglycerate mutase                                  | NM_007563                | 12183     | 6 B1      |
| 1448061_at   | 206                                                | 192                                                | 131                                          | 394                                          | 2.0493                        | 1.0725                          | 0.3313                        | 0.6331                        | 6E-06                                                           | 0.5358                                                            | 4E-06                                                         | 0.0091                                                             | Msr1          | macrophage scavenger receptor 1                                 | AA183642                 | 20288     | 8 A4      |
| 1452279_at   | 165                                                | 132                                                | 86                                           | 270                                          | 2.0465                        | 1.2546                          | 0.3188                        | 0.52                          | 8E-05                                                           | 0.1897                                                            | 0.0002                                                        | 0.0157                                                             | Cfp           | complement factor properdin                                     | BB800282                 | 18636     | X A3      |
| 1441071_at   | 78                                                 | 50                                                 | 58                                           | 102                                          | 2.0456                        | 1.558                           | 0.5693                        | 0.7475                        | 0.0008                                                          | 0.0318                                                            | 0.0008                                                        | 0.0767                                                             | Kcnq5         | potassium voltage-gated channel, subfamily Q, member 5          | BB181225                 | 226922    | 1 A5      |
| 1436055_at   | 606                                                | 770                                                | 711                                          | 1574                                         | 2.0435                        | 0.7863                          | 0.452                         | 1.1746                        | 1E-04                                                           | 0.0697                                                            | 1E-05                                                         | 0.1598                                                             | Lrrc15        | leucine rich repeat containing 15                               | AI506528                 | 74488     | 16 B2     |
| 1419292_at   | 108                                                | 72                                                 | 105                                          | 146                                          | 2.0348                        | 1.5091                          | 0.7192                        | 0.9697                        | 0.0001                                                          | 0.0321                                                            | 0.0729                                                        | 0.8781                                                             | Htra3         | Htra serine peptidase 3                                         | NM_030127                | 78558     | 5 B1      |
| 1451045_at   | 112                                                | 77                                                 | 83                                           | 157                                          | 2.0345                        | 1.4484                          | 0.5306                        | 0.7454                        | 0.0002                                                          | 0.0116                                                            | 0.0008                                                        | 0.0563                                                             | Syt13         | synaptotagmin XIII                                              | BE648447                 | 80976     | 2 E1      |
| 1438838_at   | 46                                                 | 62                                                 | 61                                           | 126                                          | 2.0323                        | 0.7418                          | 0.4852                        | 1.3294                        | 0.0046                                                          | 0.3064                                                            | 0.0044                                                        | 0.3135                                                             | B230206F22Rik | RIKEN cDNA B230206F22 gene                                      | BG141977                 | 78878     | X D       |
| 1438833_at   | 28                                                 | 74                                                 | 25                                           | 150                                          | 2.0313                        | 0.3828                          | 0.1651                        | 0.8758                        | 0.0002                                                          | 0.0004                                                            | 0.0205                                                        | 0.8461                                                             | Casc5         | cancer susceptibility candidate 5                               | BB818947                 | 76464     | 2 E5      |
| 1430228_at   | 53                                                 | 88                                                 | 61                                           | 179                                          | 2.0311                        | 0.6043                          | 0.3403                        | 1.1439                        | 0.0007                                                          | 0.0289                                                            | 0.0002                                                        | 0.5531                                                             | Dtl           | denticleless homolog (Drosophila)                               | AV308327                 | 76843     | 1 H6      |
| 1417095_a_at | 156                                                | 150                                                | 138                                          | 305                                          | 2.0304                        | 1.0361                          | 0.4528                        | 0.8874                        | 0.0044                                                          | 0.8069                                                            | 0.001                                                         | 0.3784                                                             | Hspa14        | heat shock protein 14                                           | NM_015765                | 50497     | 2 A1      |
| 1453753_at   | 32                                                 | 61                                                 | 38                                           | 123                                          | 2.0302                        | 0.5192                          | 0.3055                        | 1.1944                        | 0.0002                                                          | 0.0151                                                            | 2E-06                                                         | 0.4044                                                             | Dtl           | denticleless homolog (Drosophila)                               | AK012919                 | 76843     | 1 H6      |
| 1448534_at   | 282                                                | 271                                                | 201                                          | 550                                          | 2.0298                        | 1.0408                          | 0.3656                        | 0.713                         | 3E-07                                                           | 0.2621                                                            | 5E-09                                                         | 1E-05                                                              | Sirpa         | signal-regulatory protein alpha                                 | AB018194                 | 19261     | 2 F3      |
| 1452318_a_at | 1333                                               | 1379                                               | 1437                                         | 2792                                         | 2.0248                        | 0.9663                          | 0.5145                        | 1.078                         | 4E-07                                                           | 0.1351                                                            | 7E-06                                                         | 0.2618                                                             | Hspa1b        | heat shock protein 1B                                           | M12573                   | 15511     | 17 B1     |
| 1421228_at   | 584                                                | 556                                                | 602                                          | 1124                                         | 2.0241                        | 1.0508                          | 0.5358                        | 1.0321                        | 9E-07                                                           | 0.5582                                                            | 3E-06                                                         | 0.7109                                                             | Ccl7          | chemokine (C-C motif) ligand 7                                  | AF128193                 | 20306     | 11 C      |
| 1422477_at   | 77                                                 | 69                                                 | 64                                           | 140                                          | 2.0239                        | 1.1204                          | 0.459                         | 0.8291                        | 0.0017                                                          | 0.5844                                                            | 0.0003                                                        | 0.3206                                                             | Cables1       | Cdk5 and Abl enzyme substrate 1                                 | AF328140                 | 63955     | 18 A2     |
| 1440884_s_at | 112                                                | 160                                                | 124                                          | 323                                          | 2.0213                        | 0.6998                          | 0.3835                        | 1.1077                        | 4E-05                                                           | 0.0095                                                            | 5E-05                                                         | 0.5116                                                             | A530047J11Rik | RIKEN cDNA A530047J11 gene                                      | BB218047                 | 103767    |           |
| 1424367_a_at | 78                                                 | 96                                                 | 78                                           | 195                                          | 2.0211                        | 0.8106                          | 0.4014                        | 1.0007                        | 4E-05                                                           | 0.0228                                                            | 1E-05                                                         | 0.9949                                                             | Homer2        | homer homolog 2 (Drosophila)                                    | AB017136                 | 26557     | 7 D3      |
| 1429490_at   | 49                                                 | 100                                                | 71                                           | 202                                          | 2.0204                        | 0.4907                          | 0.3507                        | 1.4438                        | 0.0006                                                          | 0.0047                                                            | 0.001                                                         | 0.187                                                              | Rif1          | Rap1 interacting factor 1 homolog (yeast)                       | AK018316                 | 51869     | 2 C.1     |
| 1422239_at   | 179                                                | 143                                                | 175                                          | 289                                          | 2.0201                        | 1.2533                          | 0.6072                        | 0.9787                        | 2E-06                                                           | 0.0076                                                            | 6E-05                                                         | 0.7803                                                             | Hoxd13        | homeo box D13                                                   | NM_008275                | 15433     | 2 C3      |
| 1425854_x_at | 117                                                | 72                                                 | 87                                           | 146                                          | 2.0196                        | 1.6093                          | 0.5934                        | 0.7447                        | 8E-05                                                           | 0.0002                                                            | 0.0053                                                        | 0.0528                                                             | Tcrb-J        | T-cell receptor beta, joining region                            | U07661                   | 21580     | 6 20.5 cM |
| 1443445_at   | 40                                                 | 57                                                 | 32                                           | 116                                          | 2.0194                        | 0.689                           | 0.2727                        | 1.1994                        | 6E-06                                                           | 0.1383                                                            | 0.0085                                                        | 0.6242                                                             |               |                                                                 | BM238212                 |           |           |
| 1455332_x_at | 50                                                 | 67                                                 | 16                                           | 136                                          | 2.018                         | 0.7414                          | 0.1213                        | 0.33                          | 0.0003                                                          | 0.4277                                                            | 3E-05                                                         | 0.0258                                                             | Fcgr2b        | Fc receptor, IgG, low affinity IIb                              | BM224327                 | 14130     | 1 H3      |
| 1454699_at   | 138                                                | 99                                                 | 137                                          | 200                                          | 2.0168                        | 1.3927                          | 0.6869                        | 0.9947                        | 0.0003                                                          | 0.0983                                                            | 0.0013                                                        | 0.9711                                                             | Sesn1         | sestrin 1                                                       | BG076140                 | 140724    | 10 B2     |
| 1448710_at   | 164                                                | 74                                                 | 70                                           | 149                                          | 2.0164                        | 2.2137                          | 0.4662                        | 0.4247                        | 0.0001                                                          | 0.0008                                                            | 8E-06                                                         | 0.0001                                                             | Cxcr4         | chemokine (C-X-C motif) receptor 4                              | D87747                   | 12767     | 1 E4      |
| 1453064_at   | 125                                                | 168                                                | 142                                          | 339                                          | 2.016                         | 0.746                           | 0.4187                        | 1.1315                        | 5E-08                                                           | 0.0015                                                            | 7E-09                                                         | 0.0942                                                             | Eta1          | Ewing's tumor-associated antigen 1                              | AK018594                 | 68145     | 11 A3.1   |
| 1451716_at   | 209                                                | 157                                                | 153                                          | 316                                          | 2.016                         | 1.3325                          | 0.484                         | 0.7323                        | 8E-06                                                           | 0.0311                                                            | 2E-05                                                         | 0.0256                                                             | Mafb          | v-maf musculoaponeurotic fibrosarcoma oncogene family, prote    | AW412521                 | 16658     | 2 H2      |
| 1454744_at   | 111                                                | 128                                                | 117                                          | 259                                          | 2.0149                        | 0.8643                          | 0.4515                        | 1.0525                        | 0.0011                                                          | 0.355                                                             | 0.0002                                                        | 0.7204                                                             | F630043A04Rik | RIKEN cDNA F630043A04 gene                                      | BG073400                 | 219114    | 14 C3     |
| 1459374_at   | 52                                                 | 77                                                 | 59                                           | 156                                          | 2.0149                        | 0.671                           | 0.3751                        | 1.1265                        | 0.0001                                                          | 0.0037                                                            | 2E-06                                                         | 0.246                                                              |               |                                                                 | BB133363                 |           |           |
| 1425423_at   | 75                                                 | 68                                                 | 59                                           | 138                                          | 2.0147                        | 1.0976                          | 0.4302                        | 0.7896                        | 0.0008                                                          | 0.529                                                             | 0.0062                                                        | 0.358                                                              | Glis1         | GLIS family zinc finger 1                                       | AF220434                 | 230587    | 4 C6      |
| 1429524_at   | 157                                                | 106                                                | 64                                           | 213                                          | 2.0122                        | 1.4807                          | 0.2989                        | 0.4062                        | 3E-06                                                           | 0.0003                                                            | 7E-06                                                         | 9E-05                                                              | Myo1f         | myosin IF                                                       | AK021181                 | 17916     | 17 B-C    |
| 1424727_at   | 86                                                 | 64                                                 | 50                                           | 128                                          | 2.0061                        | 1.3388                          | 0.3868                        | 0.5796                        | 0.0004                                                          | 0.0717                                                            | 0.0002                                                        | 0.0108                                                             | Ccr5          | chemokine (C-C motif) receptor 5                                | D83648                   | 12774     | 9 72.0 cM |
| 1427127_x_at | 1445                                               | 1514                                               | 1722                                         | 3034                                         | 2.0035                        | 0.9545                          | 0.5676                        | 1.1913                        | 2E-05                                                           | 0.5306                                                            | 8E-05                                                         | 0.0462                                                             | Hspa1b        | heat shock protein 1B                                           | M12573                   | 15511     | 17 B1     |
| 1455724_at   | 155                                                | 171                                                | 144                                          | 342                                          | 2.003                         | 0.9104                          | 0.4221                        | 0.9286                        | 0.0005                                                          | 0.4018                                                            | 8E-05                                                         | 0.5329                                                             | Prrg1         | proline rich Gla (G-carboxyglutamic acid) 1                     | BM230193                 | 546336    | X B       |
| 1419152_at   | 351                                                | 661                                                | 464                                          | 1324                                         | 2.0023                        | 0.5303                          | 0.3508                        | 1.3244                        | 8E-09                                                           | 2E-05                                                             | 2E-07                                                         | 0.0226                                                             | 2810417H13Rik | RIKEN cDNA 2810417H13 gene                                      | AK017673                 | 68026     | 9 C       |
| 1454783_at   | 262                                                | 313                                                | 289                                          | 626                                          | 2.0019                        | 0.8359                          | 0.4619                        | 1.1064                        | 2E-05                                                           | 0.0635                                                            | 3E-06                                                         | 0.2357                                                             | Il13ra1       | interleukin 13 receptor, alpha 1                                | BI081033                 | 16164     | X A3.3    |
| 1438169_a_at | 145                                                | 82                                                 | 58                                           | 164                                          | 2.0009                        | 1.7774                          | 0.3533                        | 0.3978                        | 0.0002                                                          | 0.0009                                                            | 7E-06                                                         | 3E-05                                                              | Frm4b         | FERM domain containing 4B                                       | BB009122                 | 232288    | 6 D3      |
| 1420928_at   | 919                                                | 800                                                | 900                                          | 400                                          | 0.4999                        | 1.1488                          | 2.2514                        | 0.9797                        | 2E-06                                                           | 0.0903                                                            | 1E-07                                                         | 0.771                                                              | St6gal1       | beta galactoside alpha 2,6 sialyltransferase 1                  | BG075800                 | 20440     | 16 B1     |
| 1448942_at   | 5938                                               | 4990                                               | 5465                                         | 2489                                         | 0.4989                        | 1.1901                          | 2.1955                        | 0.9204                        | 4E-07                                                           | 0.0046                                                            | 7E-09                                                         | 0.0451                                                             | Gng11         | guanine nucleotide binding protein (G protein), gamma 11        | NM_025331                | 66066     | 6 A1      |
| 1443485_at   | 223                                                | 164                                                | 196                                          | 82                                           | 0.498                         | 1.3595                          | 2.3958                        | 0.8776                        | 0.0002                                                          | 0.003                                                             | 1E-05                                                         | 0.1118                                                             | Epha7         | Eph receptor A7                                                 | BB361326                 | 13841     | 4 A4      |
| 1441107_at   | 289                                                | 239                                                | 299                                          | 119                                          | 0.4979                        | 1.2091                          | 2.5154                        | 1.0357                        | 0.0001                                                          | 0.0339                                                            | 4E-07                                                         | 0.4377                                                             | Dmrt2         | doublesex and mab-3 related transcription factor like family A2 | BB292639                 | 242620    | C7        |
| 1449473_s_at | 117                                                | 107                                                | 120                                          | 53                                           | 0.4956                        | 1.0864                          | 2.2485                        | 1.0258                        | 0.0006                                                          | 0.6198                                                            | 2E-05                                                         | 0.8526                                                             | Cd40          | CD40 antigen                                                    | NM_011611                | 21939     | 2 H3      |
| 1433769_at   | 434                                                | 468                                                | 453                                          | 231                                          | 0.4941                        | 0.9266                          | 1.9602                        | 1.0453                        | 6E-06                                                           | 0.304                                                             | 5E-06                                                         | 0.5573                                                             | Als2cl        | ALS2 C-terminal like                                            | BM201174                 | 235633    | 9 F3      |
| 1429196_at   | 231                                                | 201                                                | 252                                          | 99                                           | 0.4937                        | 1.1513                          | 2.544                         | 1.0909                        | 0.0003                                                          | 0.2374                                                            | 5E-07                                                         | 0.2283                                                             | Rabgap1l      | RAB GTPase activating protein 1-like                            | BB431654                 | 29809     | 1 H2.1    |

Table S1 - M vs F (WT)

| Probe Set ID | Femal e<br>Cd82-<br>/- | Femal e<br>Cd82<br>+/+ | Male<br>Cd82-<br>/ | Male<br>Cd82+<br>/+ | Male<br>Cd82+/-<br>/        | Male<br>Cd82-/-<br>/         | p-value<br>Male<br>Cd82+/-<br>+ vs<br>Female<br>Cd82+/-<br>+ Ratio | p-value<br>Female<br>Cd82+/-<br>+ vs<br>Female<br>Cd82+/-<br>+ Ratio | p-value<br>Male<br>Cd82+/-<br>+ vs<br>Male<br>Cd82+/-<br>+ Ratio | p-value<br>MFemale<br>Cd82+/-<br>- vs<br>Female<br>Cd82+/-<br>+ Ratio | Gene   | Description | GB            | Entrez Id                                                     | Cytoband  |        |          |
|--------------|------------------------|------------------------|--------------------|---------------------|-----------------------------|------------------------------|--------------------------------------------------------------------|----------------------------------------------------------------------|------------------------------------------------------------------|-----------------------------------------------------------------------|--------|-------------|---------------|---------------------------------------------------------------|-----------|--------|----------|
|              | averag e<br>signal     | averag e<br>signal     | averag e<br>signal | averag e<br>signal  | FMale<br>Cd82+/-<br>+ Ratio | Female<br>Cd82+/-<br>+ Ratio | / Male<br>Cd82+/-<br>+ Ratio                                       | Female<br>Cd82+/-<br>+ Ratio                                         | Female<br>Cd82+/-<br>+ Ratio                                     | Female<br>Cd82+/-<br>+ Ratio                                          |        |             |               |                                                               |           |        |          |
| 1422592_at   | 552                    | 507                    | 464                | 251                 | 0.4937                      | 1.0877                       | 1.8526                                                             | 0.8409                                                               | 3E-06                                                            | 0.2618                                                                | 3E-06  | 0.029       | Ctrnd2        | catenin (cadherin associated protein), delta 2                | NM_008729 | 18163  | 15 B2    |
| 1429764_at   | 5317                   | 6416                   | 5620               | 3152                | 0.4913                      | 0.8288                       | 1.7827                                                             | 1.0569                                                               | 5E-07                                                            | 0.0297                                                                | 0.0003 | 0.6398      | 1500005K14Rik | RIKEN cDNA 1500005K14 gene                                    | BF101721  | 76566  | 11 B4    |
| 1422644_at   | 217                    | 138                    | 174                | 67                  | 0.4895                      | 1.5722                       | 2.5876                                                             | 0.8057                                                               | 1E-04                                                            | 0.004                                                                 | 1E-06  | 0.0584      | Sh3bgr        | SH3-binding domain glutamic acid-rich protein                 | NM_015825 | 50795  | 16 C4    |
| 1442223_at   | 1003                   | 892                    | 791                | 436                 | 0.4892                      | 1.1248                       | 1.8121                                                             | 0.7882                                                               | 0.0006                                                           | 0.239                                                                 | 0.001  | 0.0231      | Enah          | enabled homolog (Drosophila)                                  | AV329519  | 13800  | 1 H5     |
| 1434975_x_at | 4086                   | 2991                   | 3064               | 1459                | 0.4879                      | 1.3663                       | 2.1003                                                             | 0.75                                                                 | 5E-09                                                            | 1E-05                                                                 | 1E-08  | 8E-05       | 4933439C20Rik | RIKEN cDNA 4933439C20 gene                                    | AA673371  | 66776  |          |
| 1447812_x_at | 1669                   | 1708                   | 1962               | 832                 | 0.4873                      | 0.9771                       | 2.3568                                                             | 1.1753                                                               | 0.0003                                                           | 0.8413                                                                | 5E-06  | 0.0749      | Flncl         | filamin C, gamma (actin binding protein 280)                  | AV014577  | 68794  | 6 A3.3   |
| 1457899_at   | 111                    | 136                    | 121                | 66                  | 0.4873                      | 0.8168                       | 1.8193                                                             | 1.0853                                                               | 0.0003                                                           | 0.0721                                                                | 0.0012 | 0.4858      | Kalrn         | kalirin, RhoGEF kinase                                        | BG066934  | 545156 | 16 B3    |
| 1448321_at   | 403                    | 576                    | 658                | 280                 | 0.4863                      | 0.6987                       | 2.347                                                              | 1.6337                                                               | 3E-05                                                            | 0.0005                                                                | 3E-06  | 5E-05       | Smoc1         | SPARC related modular calcium binding 1                       | NM_022316 | 64075  | 12 D1    |
| 1432826_a_at | 195                    | 176                    | 205                | 85                  | 0.4862                      | 1.1086                       | 2.3955                                                             | 1.0505                                                               | 2E-06                                                            | 0.2186                                                                | 2E-07  | 0.5458      | Cd80          | CD80 antigen                                                  | AK019867  | 12519  | 16 B5    |
| 1422948_s_at | 1819                   | 1152                   | 1593               | 559                 | 0.4854                      | 1.5786                       | 2.848                                                              | 0.8758                                                               | 2E-05                                                            | 0.0003                                                                | 3E-07  | 0.1303      | Hist1h3a      | histone cluster 1, H3a                                        | NM_013550 | 360198 | 13 A2-A3 |
| 1427009_at   | 822                    | 686                    | 786                | 332                 | 0.4836                      | 1.1975                       | 2.3693                                                             | 0.9568                                                               | 4E-07                                                            | 0.0132                                                                | 4E-08  | 0.4856      | Lama5         | laminin, alpha 5                                              | AV224009  | 16776  | 2 H4     |
| 1449133_at   | 95                     | 122                    | 135                | 59                  | 0.4835                      | 0.7808                       | 2.2906                                                             | 1.4184                                                               | 8E-05                                                            | 0.0253                                                                | 2E-05  | 0.0043      | Sprr1a        | small proline-rich protein 1A                                 | NM_009264 | 20753  | 3 F1     |
| 1438370_x_at | 779                    | 613                    | 714                | 296                 | 0.4832                      | 1.272                        | 2.4103                                                             | 0.9156                                                               | 4E-06                                                            | 0.0008                                                                | 4E-07  | 0.1547      | Stk11         | serine/threonine kinase 11                                    | BB357126  | 20869  | 10 C1    |
| 1426498_at   | 351                    | 437                    | 258                | 211                 | 0.4823                      | 0.8035                       | 1.2254                                                             | 0.7354                                                               | 6E-07                                                            | 0.0534                                                                | 0.0535 | 0.0253      | Jarid1c       | jumonji, AT rich interactive domain 1C (Rbp2 like)            | AK011577  | 20591  | X F2-F4  |
| 1426758_s_at | 6727                   | 5881                   | 5596               | 2836                | 0.4822                      | 1.144                        | 1.9734                                                             | 0.8318                                                               | 0.0001                                                           | 0.0608                                                                | 0.002  | 0.2126      | Meg3          | maternally expressed 3                                        | Y13832    | 17263  | 12 F1    |
| 1426122_x_at | 132                    | 123                    | 133                | 59                  | 0.4816                      | 1.07                         | 2.2407                                                             | 1.0086                                                               | 0.0006                                                           | 0.64                                                                  | 0.0001 | 0.9498      | Coro6         | coronin, actin binding protein 6                              | AB070896  | 216961 | 11 B5    |
| 1456526_at   | 825                    | 964                    | 893                | 464                 | 0.4809                      | 0.8562                       | 1.9261                                                             | 1.0819                                                               | 1E-06                                                            | 0.2453                                                                | 1E-08  | 0.4681      | Hoxa9         | homeo box A9                                                  | AA987181  | 15405  | 6 B3     |
| 1424568_at   | 792                    | 623                    | 741                | 299                 | 0.4805                      | 1.272                        | 2.4761                                                             | 0.9354                                                               | 7E-07                                                            | 0.0005                                                                | 1E-08  | 0.1256      | Tspan2        | tetraspanin 2                                                 | BC007185  | 70747  | 3 F3     |
| 1432092_a_at | 431                    | 438                    | 428                | 210                 | 0.4803                      | 0.9834                       | 2.0354                                                             | 0.9942                                                               | 7E-07                                                            | 0.826                                                                 | 3E-06  | 0.9467      | Gulp1         | GULP, engulfment adaptor PTB domain containing 1              | AK017798  | 70676  | 1 C1     |
| 1452412_at   | 782                    | 713                    | 905                | 342                 | 0.4802                      | 1.0979                       | 2.6433                                                             | 1.1562                                                               | 1E-06                                                            | 0.3205                                                                | 4E-08  | 0.1235      | Hoxc8         | homeo box C8                                                  | BB283726  | 15426  | 15 F3    |
| 1450482_a_at | 122                    | 134                    | 133                | 64                  | 0.4795                      | 0.9129                       | 2.0665                                                             | 1.0853                                                               | 1E-05                                                            | 0.1793                                                                | 1E-05  | 0.2977      | Pitx2         | paired-like homeodomain transcription factor 2                | AB006320  | 18741  | 3 G3     |
| 1418412_at   | 420                    | 307                    | 352                | 147                 | 0.4792                      | 1.367                        | 2.3902                                                             | 0.838                                                                | 8E-05                                                            | 0.002                                                                 | 2E-06  | 0.0075      | Tpd521l       | tumor protein D52-like 1                                      | NM_009413 | 21987  | 10 A4-B2 |
| 1428357_at   | 173                    | 114                    | 139                | 54                  | 0.479                       | 1.5244                       | 2.5557                                                             | 0.803                                                                | 0.0002                                                           | 0.0006                                                                | 2E-05  | 0.0409      | 2610019F03Rik | RIKEN cDNA 2610019F03 gene                                    | AK011462  | 72148  | 8 A1.1   |
| 1440617_at   | 477                    | 389                    | 431                | 186                 | 0.4774                      | 1.2253                       | 2.3174                                                             | 0.903                                                                | 1E-06                                                            | 0.0116                                                                | 2E-05  | 0.3666      | Cpa6          | carboxypeptidase A6                                           | BB072673  | 329093 | 1 A2     |
| 1438115_a_at | 1376                   | 1205                   | 1275               | 575                 | 0.4773                      | 1.1416                       | 2.2157                                                             | 0.9264                                                               | 9E-07                                                            | 0.0928                                                                | 2E-09  | 0.1461      | Slc9a3r1      | solute carrier family 9 (sodium/hydrogen exchanger), member 3 | BB805362  | 26941  | 11 E2    |
| 1426387_x_at | 3275                   | 2634                   | 2619               | 1256                | 0.4769                      | 1.2434                       | 2.0854                                                             | 0.7998                                                               | 3E-06                                                            | 0.0004                                                                | 1E-06  | 0.0006      | 4933439C20Rik | RIKEN cDNA 4933439C20 gene                                    | BB085906  | 66776  |          |
| 1449959_x_at | 2944                   | 1802                   | 2039               | 856                 | 0.4752                      | 1.6339                       | 2.3815                                                             | 0.6926                                                               | 1E-05                                                            | 0.0027                                                                | 2E-05  | 0.0231      | Lce1h         | late cornified envelope 1H                                    | NM_026335 | 67718  | 3 F1     |
| 1424927_at   | 5245                   | 4413                   | 5348               | 2093                | 0.4742                      | 1.1885                       | 2.5554                                                             | 1.0196                                                               | 3E-09                                                            | 0.0074                                                                | 2E-10  | 0.7047      | Glpr1         | GLI pathogenesis-related 1 (glioma)                           | BC025083  | 73690  | 10 D1    |
| 1431162_a_at | 358                    | 339                    | 287                | 160                 | 0.4732                      | 1.0565                       | 1.7896                                                             | 0.8016                                                               | 0.0007                                                           | 0.6128                                                                | 0.0024 | 0.0697      | Enah          | enabled homolog (Drosophila)                                  | AK020248  | 13800  | 1 H5     |
| 1416666_at   | 7707                   | 5177                   | 6903               | 2449                | 0.4731                      | 1.4888                       | 2.8182                                                             | 0.8956                                                               | 6E-05                                                            | 0.0003                                                                | 9E-07  | 0.1118      | Serpine2      | serine (or cysteine) peptidase inhibitor, clade E, member 2   | NM_009255 | 20720  | 1 C4     |
| 1419613_at   | 2316                   | 2420                   | 2265               | 1144                | 0.4726                      | 0.9569                       | 1.9797                                                             | 0.9777                                                               | 8E-05                                                            | 0.2115                                                                | 0.0006 | 0.824       | Col7a1        | collagen, type VII, alpha 1                                   | NM_007738 | 12836  | 9 F2     |
| 1450803_at   | 354                    | 227                    | 304                | 107                 | 0.4711                      | 1.5618                       | 2.8464                                                             | 0.8585                                                               | 0.002                                                            | 0.0017                                                                | 8E-05  | 0.1622      | Ntf3          | neurotrophin 3                                                | NM_008742 | 18205  | 6 F3     |
| 1416688_at   | 246                    | 137                    | 170                | 65                  | 0.4707                      | 1.7887                       | 2.6269                                                             | 0.6912                                                               | 1E-06                                                            | 0.0004                                                                | 1E-06  | 0.0121      | Snap91        | synaptosomal-associated protein 91                            | NM_013669 | 20616  |          |
| 1426791_at   | 1980                   | 1413                   | 1716               | 665                 | 0.4707                      | 1.4014                       | 2.581                                                              | 0.8668                                                               | 3E-06                                                            | 8E-05                                                                 | 9E-08  | 0.0148      | Rusc2         | RUN and SH3 domain containing 2                               | BC024790  | 100213 | 4 A5     |
| 1425092_at   | 881                    | 1085                   | 1178               | 510                 | 0.4701                      | 0.8121                       | 2.31                                                               | 1.3372                                                               | 3E-08                                                            | 0.013                                                                 | 2E-07  | 0.0055      | Cdh10         | cadherin 10                                                   | AF183946  | 320873 | 15 A2    |
| 1437502_x_at | 2389                   | 1806                   | 1937               | 848                 | 0.4699                      | 1.3232                       | 2.2831                                                             | 0.8108                                                               | 6E-07                                                            | 0.0026                                                                | 4E-08  | 0.0074      | Cd24a         | CD24a antigen                                                 | BB560574  | 12484  | 10 B2    |
| 1442880_at   | 238                    | 228                    | 252                | 107                 | 0.4697                      | 1.042                        | 2.3507                                                             | 1.0597                                                               | 4E-05                                                            | 0.6163                                                                | 2E-06  | 0.4001      |               |                                                               | AV319882  |        |          |
| 1435132_at   | 348                    | 310                    | 302                | 145                 | 0.469                       | 1.1249                       | 2.0777                                                             | 0.8663                                                               | 7E-06                                                            | 0.2434                                                                | 6E-06  | 0.1583      | Disp1         | dispatched homolog 1 (Drosophila)                             | AI505698  | 68897  |          |
| 1457044_at   | 112                    | 131                    | 127                | 61                  | 0.4658                      | 0.8568                       | 2.0766                                                             | 1.129                                                                | 0.0002                                                           | 0.2347                                                                | 0.0011 | 0.4571      | 4732474O15Rik | RIKEN cDNA 4732474O15 gene                                    | BB007136  | 238455 | 12 F2    |
| 1454224_at   | 799                    | 696                    | 756                | 324                 | 0.4656                      | 1.1471                       | 2.3313                                                             | 0.9464                                                               | 3E-07                                                            | 0.0183                                                                | 3E-07  | 0.4154      | 2010300F17Rik | RIKEN cDNA 2010300F17 gene                                    | AK008491  | 69884  |          |
| 1440108_at   | 194                    | 198                    | 214                | 92                  | 0.4648                      | 0.983                        | 2.3282                                                             | 1.1007                                                               | 1E-05                                                            | 0.8224                                                                | 7E-07  | 0.1788      | Foxp2         | forkhead box P2                                               | BM964154  | 114142 | 6 A2     |
| 1435510_at   | 149                    | 118                    | 136                | 55                  | 0.4646                      | 1.265                        | 2.4846                                                             | 0.9125                                                               | 7E-06                                                            | 0.0367                                                                | 3E-07  | 0.3185      | Ppm1h         | protein phosphatase 1H (PP2C domain containing)               | BB283101  | 319468 | 10 D2    |
| 1435584_at   | 230                    | 151                    | 155                | 70                  | 0.4629                      | 1.5274                       | 2.226                                                              | 0.6747                                                               | 0.0067                                                           | 0.0029                                                                | 0.003  | 0.0043      | A630033H20Rik | RIKEN cDNA A630033H20 gene                                    | BB034567  | 213438 | X D      |
| 1424797_a_at | 414                    | 363                    | 431                | 168                 | 0.4622                      | 1.1416                       | 2.5702                                                             | 1.0405                                                               | 1E-06                                                            | 0.0737                                                                | 2E-07  | 0.6091      | Pitx2         | paired-like homeodomain transcription factor 2                | U80011    | 18741  | 3 G3     |
| 1437932_a_at | 133                    | 120                    | 132                | 55                  | 0.462                       | 1.1122                       | 2.3907                                                             | 0.9931                                                               | 7E-05                                                            | 0.2106                                                                | 9E-06  | 0.9295      | Cldn1         | claudin 1                                                     | AV227581  | 12737  | 16 B2    |
| 1443814_x_at | 643                    | 592                    | 643                | 274                 | 0.4618                      | 1.0859                       | 2.3516                                                             | 0.9999                                                               | 2E-09                                                            | 0.0319                                                                | 8E-11  | 0.9981      | Ctsh          | cathepsin H                                                   | BB542535  | 13036  | 9 E3.1   |
| 1427361_at   | 521                    | 506                    | 643                | 233                 | 0.4614                      | 1.0292                       | 2.7519                                                             | 1.2338                                                               | 2E-05                                                            | 0.6133                                                                | 2E-07  | 0.0007      | Hoxc6         | homeo box C6                                                  | BB440143  | 15425  | 15 E2    |
| 1438232_at   | 355                    | 371                    | 411                | 171                 | 0.4596                      | 0.9554                       | 2.4073                                                             | 1.1581                                                               | 3E-06                                                            | 0.3764                                                                | 3E-07  | 0.0132      | Foxp2         | forkhead box P2                                               | AV322952  | 114142 | 6 A2     |
| 1434802_s_at | 361                    | 229                    | 278                | 105                 | 0.458                       | 1.577                        | 2.6499                                                             | 0.7697                                                               | 4E-06                                                            | 3E-05                                                                 | 1E-07  | 0.0007      | Ntf3          | neurotrophin 3                                                | BE945709  | 18205  | 6 F3     |
| 1427354_at   | 159                    | 128                    | 146                | 59                  | 0.4574                      | 1.2404                       | 2.488                                                              | 0.9176                                                               | 0.0002                                                           | 0.0062                                                                | 4E-05  | 0.3153      | Hoxa4         | homeo box A4                                                  | AV135424  | 15401  | 6 B3     |
| 1416689_at   | 509                    | 324                    | 371                | 147                 | 0.4557                      | 1.5732                       | 2.5189                                                             | 0.7297                                                               | 0.0001                                                           | 0.0012                                                                | 3E-05  | 0.0154      | Tuft1         | tuftelin 1                                                    | NM_011656 | 22156  | 3 F2     |
| 1433909_at   | 194                    | 155                    | 176                | 71                  | 0.4556                      | 1.2462                       | 2.4823                                                             | 0.9075                                                               | 0.0027                                                           | 0.0165                                                                | 0.0006 | 0.3316      | Syt17         | synaptotagmin XVII                                            | AW048713  | 110058 | 7 F2     |
| 1448823_at   | 10674                  | 10311                  | 11983              | 4692                | 0.4551                      | 1.0353                       | 2.5541                                                             | 1.1226                                                               | 7E-09                                                            | 0.3456                                                                | 2E-11  | 0.001       | Cxcl12        | chemokine (C-X-C motif) ligand 12                             | BC006640  | 20315  | 6 F1     |
| 1420992_at   | 6507                   | 5951                   | 6909               | 2691                | 0.4523                      | 1.0934                       | 2.5674                                                             | 1.0619                                                               | 3E-08                                                            | 0.1877                                                                | 4E-09  | 0.3687      | Ankrd1        | ankyrin repeat domain 1 (cardiac muscle)                      | AK009959  | 107765 | 19 C3    |
| 1417109_at   | 5328                   | 3919                   | 4757               | 1769                | 0.4513                      | 1.3595                       | 2.6896                                                             | 0.8928                                                               | 1E-06                                                            | 0.0016                                                                | 8E-09  | 0.0734      | Tinagl1       | tubulointerstitial nephritis antigen-like 1                   | BC005738  | 9424   | 4 D3     |
| 1449036_at   | 2908                   | 2339                   | 2457               | 1054                | 0.4504                      | 1.2432                       | 2.3324                                                             | 0.845                                                                | 1E-08                                                            | 0.0006                                                                | 3E-09  | 0.0034      | Rnf128        | ring finger protein 128                                       | AK004847  | 66889  | X F1     |

Table S1 - M vs F (WT)

| Probe Set ID | Femal e Cd82-/- | Femal e Cd82+/- | Male Cd82-/-    | Male Cd82+/-    | Male Cd82+/- | Male Cd82+/- | Male Cd82+/- | p-value Male Cd82+/- | p-value Female Cd82+/- | p-value Male Cd82+/- | p-value Female Cd82+/- | Gene   | Description   | GB                                                           | Entrez Id | Cytoband        |
|--------------|-----------------|-----------------|-----------------|-----------------|--------------|--------------|--------------|----------------------|------------------------|----------------------|------------------------|--------|---------------|--------------------------------------------------------------|-----------|-----------------|
|              | averag e signal | averag e signal | averag e signal | averag e signal | +/+ Ratio    | +/- Ratio    | +/- Ratio    | + vs Cd82+/-         | + vs Cd82+/-           | + vs Cd82+/-         | + vs Cd82+/-           |        |               |                                                              |           |                 |
| 1457198_at   | 1641            | 2098            | 1861            | 944             | 0.4498       | 0.7824       | 1.9724       | 1.1339               | 3E-07                  | 0.0033               | 3E-06                  | 0.1179 | Nrp1          | neuropilin 1                                                 | AV291009  | 18186 8 E       |
| 1455679_at   | 177             | 107             | 141             | 48              | 0.4494       | 1.6539       | 2.9254       | 0.7949               | 0.0019                 | 0.0012               | 6E-05                  | 0.0328 |               |                                                              | BE457727  |                 |
| 1439757_s_at | 376             | 274             | 301             | 123             | 0.4489       | 1.3747       | 2.4535       | 0.8012               | 5E-06                  | 0.0002               | 0.0004                 | 0.2002 | Epha4         | Eph receptor A4                                              | AI385584  | 13838 1 C1-C5   |
| 1450469_at   | 312             | 250             | 297             | 112             | 0.4481       | 1.2488       | 2.6552       | 0.9528               | 5E-06                  | 0.0677               | 6E-08                  | 0.6114 | RP23-394O9.3  | differential display clone 8                                 | NM_021440 | 58251 11 E2     |
| 1418762_at   | 363             | 198             | 230             | 89              | 0.4476       | 1.8321       | 2.5922       | 0.6332               | 5E-05                  | 0.0006               | 2E-05                  | 0.0059 | Cd55          | CD55 antigen                                                 | NM_010016 | 13136 1 E4      |
| 1423362_at   | 672             | 443             | 547             | 198             | 0.447        | 1.5173       | 2.7613       | 0.8134               | 4E-06                  | 0.0002               | 6E-08                  | 0.0065 | Sort1         | sortilin 1                                                   | AV247637  | 20661 3 F3      |
| 1416754_at   | 217             | 150             | 217             | 67              | 0.447        | 1.4471       | 3.2321       | 0.9983               | 0.0078                 | 0.0141               | 0.0002                 | 0.9842 | Prkar1b       | protein kinase, cAMP dependent regulatory, type I beta       | NM_008923 | 19085 5 G2      |
| 1460242_at   | 353             | 194             | 226             | 86              | 0.4463       | 1.8242       | 2.6133       | 0.6393               | 8E-05                  | 0.0002               | 1E-05                  | 0.0017 | Cd55          | CD55 antigen                                                 | NM_010016 | 13136 1 E4      |
| 1454674_at   | 1459            | 1495            | 1584            | 666             | 0.4454       | 0.976        | 2.379        | 1.0856               | 2E-08                  | 0.6514               | 1E-09                  | 0.1159 | Fez1          | fasciculation and elongation protein zeta 1 (zygin I)        | AU067669  | 235180 9 A4     |
| 1453708_a_at | 95              | 123             | 109             | 55              | 0.4445       | 0.7722       | 1.9923       | 1.1469               | 0.0008                 | 0.0132               | 0.0008                 | 0.0871 | Gsto2         | glutathione S-transferase omega 2                            | AK019582  | 68214 19 D2     |
| 1419486_at   | 1359            | 1306            | 1416            | 579             | 0.4434       | 1.0404       | 2.4458       | 1.0422               | 6E-10                  | 0.3826               | 5E-11                  | 0.342  | Foxc1         | forkhead box C1                                              | BB759833  | 17300 13 A3.2   |
| 1441070_at   | 360             | 282             | 321             | 125             | 0.4423       | 1.2782       | 2.5713       | 0.8898               | 9E-07                  | 0.003                | 3E-08                  | 0.0576 |               |                                                              | BB660130  |                 |
| 1456220_at   | 458             | 440             | 455             | 194             | 0.4409       | 1.0403       | 2.3451       | 0.9939               | 1E-05                  | 0.5874               | 3E-06                  | 0.9311 | Fbxl7         | F-box and leucine-rich repeat protein 7                      | BB446014  | 448987 15 B1    |
| 1435756_at   | 174             | 134             | 139             | 59              | 0.4396       | 1.2977       | 2.3613       | 0.8                  | 3E-05                  | 0.0374               | 3E-07                  | 0.0127 | Samd10        | sterile alpha motif domain containing 10                     | BB526577  | 229011 2 H4     |
| 1428794_at   | 2464            | 2672            | 2826            | 1174            | 0.4394       | 0.922        | 2.4065       | 1.1469               | 2E-09                  | 0.0769               | 9E-09                  | 0.0304 | Specc1        | sperm antigen with calponin homology and coiled-coil domains | BQ175052  | 432572 11 B2    |
| 1418486_at   | 901             | 434             | 608             | 190             | 0.439        | 2.0771       | 3.191        | 0.6744               | 2E-07                  | 0.0007               | 2E-09                  | 0.0139 | Vnn1          | vanin 1                                                      | NM_011704 | 22661 10 A1-B2  |
| 1429052_at   | 499             | 446             | 474             | 196             | 0.4386       | 1.1178       | 2.425        | 0.9516               | 2E-06                  | 0.1307               | 3E-07                  | 0.4563 | Ptprd         | protein tyrosine phosphatase, receptor type, D               | AK003303  | 19266 4 C3      |
| 1457825_x_at | 2265            | 1257            | 1704            | 550             | 0.4378       | 1.8021       | 3.0967       | 0.7524               | 5E-06                  | 0.0002               | 4E-07                  | 0.0231 | Tcn2          | transcobalamin 2                                             | BB515151  | 21452 11 A1     |
| 1419032_at   | 206             | 173             | 181             | 76              | 0.437        | 1.1922       | 2.3934       | 0.8773               | 6E-05                  | 0.1267               | 2E-06                  | 0.0951 | Papola        | poly (A) polymerase alpha                                    | AW556821  | 18789 12 F1     |
| 1428671_at   | 921             | 792             | 894             | 346             | 0.4366       | 1.1622       | 2.5848       | 0.9712               | 2E-08                  | 0.0465               | 1E-08                  | 0.6859 | 2200002D01Rik | RIKEN cDNA 2200002D01 gene                                   | AK008617  | 72275 7 A3      |
| 1422155_at   | 673             | 362             | 494             | 158             | 0.4351       | 1.8593       | 3.1325       | 0.733                | 1E-04                  | 1E-06                | 4E-06                  | 0.0023 | Hist2h3c2     | histone cluster 2, H3c2                                      | BC015270  | 97114 3 F.2.1   |
| 1423915_at   | 2778            | 2391            | 2665            | 1040            | 0.435        | 1.1618       | 2.5626       | 0.9594               | 1E-08                  | 0.0935               | 4E-10                  | 0.5817 | Olfml2b       | olfactomedin-like 2B                                         | BC025654  | 320078 1 H3     |
| 1432205_a_at | 228             | 244             | 217             | 106             | 0.434        | 0.9346       | 2.0424       | 0.9485               | 4E-05                  | 0.4143               | 5E-05                  | 0.5094 | C130038G02Rik | RIKEN cDNA C130038G02 gene                                   | AK002529  | 77521 5 G3      |
| 1418366_at   | 1002            | 480             | 710             | 208             | 0.4335       | 2.0886       | 3.4156       | 0.709                | 1E-05                  | 1E-04                | 2E-06                  | 0.0304 | Hist2h2aa1    | histone cluster 2, H2aa1                                     | BC010564  | 15267 3 F1-F2   |
| 1419485_at   | 639             | 580             | 664             | 251             | 0.4333       | 1.1014       | 2.6413       | 1.0391               | 4E-08                  | 0.1543               | 5E-09                  | 0.5554 | Foxc1         | forkhead box C1                                              | BB759833  | 17300 13 A3.2   |
| 1449151_at   | 1146            | 962             | 979             | 416             | 0.4323       | 1.1916       | 2.3542       | 0.8541               | 4E-07                  | 0.0136               | 8E-08                  | 0.02   | Pctk3         | PCTAIRE-motif protein kinase 3                               | NM_008795 | 18557 1 E4      |
| 1418357_at   | 842             | 648             | 684             | 280             | 0.4322       | 1.2993       | 2.4423       | 0.8124               | 3E-07                  | 0.0007               | 2E-07                  | 0.009  | Foxg1         | forkhead box G1                                              | NM_008241 | 15228 12 B3     |
| 1435695_a_at | 965             | 1160            | 969             | 501             | 0.4319       | 0.8317       | 1.9353       | 1.0049               | 3E-07                  | 0.1624               | 2E-07                  | 0.9646 | A030007L17Rik | RIKEN cDNA A030007L17 gene                                   | AA673177  | 68252 6 B3      |
| 1436613_at   | 152             | 108             | 126             | 47              | 0.4312       | 1.4061       | 2.7041       | 0.8292               | 0.0003                 | 0.0057               | 4E-05                  | 0.0905 | Coro6         | coronin, actin binding protein 6                             | AI507196  | 216961 11 B5    |
| 1456721_at   | 270             | 242             | 250             | 104             | 0.4309       | 1.1123       | 2.3959       | 0.9282               | 4E-05                  | 0.095                | 2E-05                  | 0.3047 | Thsd7a        | thrombospondin, type I, domain containing 7A                 | BE690988  | 330267 6 A1     |
| 1427362_x_at | 662             | 562             | 701             | 242             | 0.4301       | 1.1764       | 2.8959       | 1.0589               | 2E-06                  | 0.0198               | 5E-08                  | 0.3208 | Hoxc6         | homeo box C6                                                 | BB440143  | 15425 15 E2     |
| 1435353_a_at | 1050            | 832             | 886             | 356             | 0.4284       | 1.2622       | 2.487        | 0.8441               | 2E-07                  | 0.0141               | 1E-07                  | 0.0596 | Sfi1          | Sfi1 homolog, spindle assembly associated (yeast)            | BI454991  | 78887 11 A1     |
| 1424567_at   | 2089            | 1515            | 1795            | 648             | 0.4277       | 1.3787       | 2.7699       | 0.8593               | 1E-08                  | 8E-06                | 2E-10                  | 0.001  | Tspan2        | tetraspanin 2                                                | BC007185  | 70747 3 F3      |
| 1429830_a_at | 464             | 1395            | 368             | 596             | 0.4272       | 0.3323       | 0.6181       | 0.7945               | 6E-07                  | 4E-08                | 2E-05                  | 0.0042 | Cd59a         | CD59a antigen                                                | AK005507  | 12509 2 55.0 cM |
| 1427605_at   | 354             | 294             | 331             | 125             | 0.4268       | 1.2046       | 2.643        | 0.9365               | 1E-05                  | 0.1307               | 5E-06                  | 0.5903 | Hoxb3         | homeo box B3                                                 | X66177    | 15410 11 D      |
| 1450325_at   | 225             | 159             | 221             | 68              | 0.4256       | 1.4136       | 3.2622       | 0.9822               | 0.0006                 | 0.0163               | 2E-05                  | 0.874  | Angpt4        | angiopoietin 4                                               | NM_009641 | 11602 2 G3      |
| 1427735_a_at | 5100            | 4136            | 5534            | 1759            | 0.4253       | 1.2332       | 3.1461       | 1.0851               | 1E-09                  | 0.0004               | 4E-12                  | 0.0413 | Acta1         | actin, alpha 1, skeletal muscle                              | M12233    | 11459 8 E2      |
| 1416242_at   | 433             | 257             | 326             | 109             | 0.4249       | 1.6841       | 2.9865       | 0.7535               | 2E-07                  | 6E-05                | 6E-08                  | 0.0078 | Klhl13        | kelch-like 13 (Drosophila)                                   | NM_026167 | 67455 X A2      |
| 1420693_at   | 388             | 329             | 381             | 139             | 0.4223       | 1.1805       | 2.7464       | 0.9825               | 4E-05                  | 0.1938               | 3E-08                  | 0.8113 | Myom13        | myomesin 1                                                   | NM_010867 | 17929 17 E1.3   |
| 1460379_at   | 296             | 216             | 280             | 91              | 0.4217       | 1.3741       | 3.0766       | 0.9442               | 7E-05                  | 0.0017               | 6E-07                  | 0.1937 | Hoxb4         | homeo box B4                                                 | AV307188  | 15412 11 D      |
| 1439878_at   | 398             | 207             | 244             | 87              | 0.4215       | 1.9185       | 2.7912       | 0.6133               | 2E-05                  | 6E-05                | 3E-05                  | 0.0047 | Ivi           | involutrin                                                   | AV009441  | 16447 3 F1      |
| 1428433_at   | 2891            | 3110            | 3199            | 1307            | 0.4202       | 0.9296       | 2.4473       | 1.1063               | 6E-11                  | 0.3027               | 3E-10                  | 0.1616 | Hipk2         | homeodomain interacting protein kinase 2                     | AK003718  | 15258 6 B       |
| 1453127_at   | 193             | 182             | 180             | 76              | 0.4199       | 1.0634       | 2.3579       | 0.931                | 0.0003                 | 0.6421               | 4E-05                  | 0.4717 | Ppm1j         | protein phosphatase 1J                                       | AK009235  | 71887 3 F3      |
| 1456022_at   | 1101            | 1167            | 1200            | 489             | 0.4194       | 0.944        | 2.4534       | 1.09                 | 0.0003                 | 0.5132               | 2E-06                  | 0.4053 | Hipk2         | homeodomain interacting protein kinase 2                     | BB554636  | 15258 6 B       |
| 1417156_at   | 755             | 993             | 795             | 416             | 0.4192       | 0.7601       | 1.9106       | 1.0536               | 3E-07                  | 0.0028               | 1E-06                  | 0.4392 | Krt19         | keratin 19                                                   | NM_008471 | 16669 11 D      |
| 1420991_at   | 6910            | 6797            | 7709            | 2841            | 0.418        | 1.0166       | 2.7131       | 1.1156               | 2E-08                  | 0.8057               | 2E-09                  | 0.1162 | Ankrd1        | ankyrin repeat domain 1 (cardiac muscle)                     | AK009959  | 107765 19 C3    |
| 1416034_at   | 5286            | 4308            | 4306            | 1796            | 0.417        | 1.2272       | 2.3976       | 0.8146               | 5E-09                  | 0.0003               | 1E-08                  | 0.0019 | Cd24a         | CD24a antigen                                                | NM_009846 | 10040 10 B2     |
| 1447886_at   | 602             | 428             | 639             | 178             | 0.416        | 1.4065       | 3.5889       | 1.0615               | 4E-05                  | 0.0067               | 8E-07                  | 0.5702 | 0610040B09Rik | RIKEN cDNA 0610040B09 gene                                   | AV302770  | 75395           |
| 1418393_a_at | 881             | 735             | 815             | 304             | 0.414        | 1.1984       | 2.6799       | 0.9257               | 9E-07                  | 0.0001               | 1E-07                  | 0.0958 | Itga7         | integrin alpha 7                                             | NM_008398 | 16404 10 D3     |
| 1448260_at   | 2751            | 1958            | 2750            | 804             | 0.4106       | 1.4049       | 3.4202       | 0.9997               | 2E-09                  | 3E-07                | 9E-11                  | 0.9936 | Uchl1         | ubiquitin carboxy-terminal hydrolase L1                      | NM_011670 | 22223 5 C3.1    |
| 1429135_at   | 198             | 122             | 160             | 50              | 0.41         | 1.6238       | 3.2028       | 0.8086               | 0.0047                 | 0.0087               | 0.0001                 | 0.0236 | 1110059M19Rik | RIKEN cDNA 1110059M19 gene                                   | AV015858  | 68800 X A4      |
| 1425463_at   | 198             | 278             | 237             | 114             | 0.4098       | 0.7119       | 2.0784       | 1.1964               | 2E-07                  | 0.0022               | 1E-07                  | 0.0309 | Gata6         | GATA binding protein 6                                       | BM214048  | 14465 18 A1     |
| 1425217_at   | 271             | 247             | 333             | 101             | 0.409        | 1.0979       | 3.2913       | 1.2261               | 0.0003                 | 0.3002               | 0.0005                 | 0.3376 | Hoxb9         | homeo box B9                                                 | AA386586  | 15417 11 D      |
| 1435426_s_at | 164             | 120             | 154             | 49              | 0.4081       | 1.3723       | 3.1471       | 0.9359               | 9E-05                  | 0.0033               | 7E-06                  | 0.5    | Pisd          | phosphatidylserine decarboxylase                             | AV212090  | 320951 5 B1     |
| 1418415_at   | 270             | 216             | 261             | 88              | 0.4071       | 1.2538       | 2.9716       | 0.9649               | 0.0002                 | 0.0068               | 2E-05                  | 0.6241 | Hoxb5         | homeo box B5                                                 | NM_008268 | 15413 11 D      |
| 1424863_a_at | 1201            | 1272            | 1431            | 515             | 0.405        | 0.9443       | 2.7778       | 1.1915               | 5E-07                  | 0.4051               | 1E-08                  | 0.0092 | Hipk2         | homeodomain interacting protein kinase 2                     | AF170301  | 15258 6 B       |

Table S1 - M vs F (WT)

| Probe Set ID | Femal<br>e<br>Cd82-<br>/-<br>avera<br>ge<br>signal | Femal<br>e<br>Cd82<br>+/<br>avera<br>ge<br>signal | Male<br>Cd82-<br>/-<br>avera<br>ge<br>signal | Male<br>Cd82+<br>/+<br>avera<br>ge<br>signal | Male<br>Cd82+/<br>/+<br>Ratio | Female<br>Cd82-/<br>/-<br>Ratio | Male<br>Cd82-/<br>/-<br>Ratio | Male<br>Cd82+/<br>/+<br>Ratio | p-value<br>Male<br>Cd82+/<br>/+<br>vs<br>Female<br>Cd82+/<br>/+ | p-value<br>Female<br>Cd82+/<br>/+<br>vs<br>Female<br>Cd82-/<br>/- | p-value<br>Male<br>Cd82+/<br>/+<br>vs<br>Male<br>Cd82-/<br>/- | p-value<br>MFemale<br>Cd82-/<br>/-<br>vs<br>Female<br>Cd82-/<br>/- | Gene          | Description                                                         | GB                 | Entrez Id | Cytoband |
|--------------|----------------------------------------------------|---------------------------------------------------|----------------------------------------------|----------------------------------------------|-------------------------------|---------------------------------|-------------------------------|-------------------------------|-----------------------------------------------------------------|-------------------------------------------------------------------|---------------------------------------------------------------|--------------------------------------------------------------------|---------------|---------------------------------------------------------------------|--------------------|-----------|----------|
|              | 1420558_at                                         | 179                                               | 118                                          | 142                                          | 48                            | 0.4044                          | 1.5218                        | 2.987                         | 0.7938                                                          | 8E-05                                                             | 0.0162                                                        | 7E-07                                                              | 0.064         | Selp                                                                | selectin, platelet | M72332    | 20344    |
| 1418072_at   | 10949                                              | 7496                                              | 9638                                         | 3027                                         | 0.4039                        | 1.4606                          | 3.1837                        | 0.8803                        | 2E-06                                                           | 6E-08                                                             | 3E-08                                                         | 0.0006                                                             | Hist1h2bc     | histone cluster 1, H2bc                                             | NM_023422          | 68024     | 13 A3.1  |
| 1422668_at   | 2394                                               | 1759                                              | 2140                                         | 710                                          | 0.4037                        | 1.3611                          | 3.0132                        | 0.8938                        | 2E-07                                                           | 8E-05                                                             | 3E-08                                                         | 0.0931                                                             | Serpinh9b     | serine (or cysteine) peptidase inhibitor, clade B, member 9b        | NM_011452          | 20706     | 13 A3.3  |
| 1434913_at   | 235                                                | 106                                               | 163                                          | 43                                           | 0.4037                        | 2.2208                          | 3.821                         | 0.6945                        | 0.0004                                                          | 2E-05                                                             | 2E-06                                                         | 0.0006                                                             | Hmgcl1        | 3-hydroxymethyl-3-methylglutaryl-Coenzyme A lyase-like 1            | BF471959           | 208982    | 9 D      |
| 1451991_at   | 294                                                | 226                                               | 267                                          | 91                                           | 0.4028                        | 1.3026                          | 2.9345                        | 0.9073                        | 0.0019                                                          | 0.0319                                                            | 0.0001                                                        | 0.1798                                                             | Epha7         | Eph receptor A7                                                     | BC026153           | 13841     | 4 A4     |
| 1435421_at   | 265                                                | 191                                               | 242                                          | 77                                           | 0.4027                        | 1.3872                          | 3.1479                        | 0.9139                        | 0.0056                                                          | 0.0068                                                            | 0.0007                                                        | 0.4138                                                             | Fsd1          | fibronectin type 3 and SPRY domain-containing protein               | BQ175318           | 240121    | 17 D     |
| 1429718_at   | 255                                                | 167                                               | 165                                          | 67                                           | 0.4025                        | 1.5267                          | 2.4561                        | 0.6475                        | 0.0005                                                          | 0.0094                                                            | 0.0002                                                        | 0.0048                                                             | Slitrk5       | SLIT and NTRK-like family, member 5                                 | BB782729           | 75409     | 14 E3    |
| 1449357_at   | 266                                                | 196                                               | 241                                          | 79                                           | 0.4015                        | 1.3577                          | 3.0635                        | 0.906                         | 2E-05                                                           | 0.0085                                                            | 8E-07                                                         | 0.2584                                                             | 2310030G06Rik | RIKEN cDNA 2310030G06 gene                                          | NM_025865          | 66952     | 9 A5.3   |
| 1422870_at   | 315                                                | 244                                               | 295                                          | 97                                           | 0.3971                        | 1.2878                          | 3.044                         | 0.9387                        | 1E-05                                                           | 0.0074                                                            | 6E-07                                                         | 0.3959                                                             | Hoxc4         | homeo box C4                                                        | NM_013553          | 15423     | 15 F3    |
| 1425240_a_at | 10146                                              | 7094                                              | 9393                                         | 2799                                         | 0.3946                        | 1.4303                          | 3.3553                        | 0.9258                        | 5E-07                                                           | 5E-06                                                             | 1E-08                                                         | 0.0879                                                             | Hist1h2bp     | histone cluster 1, H2bp                                             | M25487             | 319188    | 13 A3.1  |
| 1448631_a_at | 552                                                | 525                                               | 532                                          | 206                                          | 0.3928                        | 1.0519                          | 2.5789                        | 0.963                         | 0.0001                                                          | 0.6301                                                            | 5E-05                                                         | 0.7185                                                             | Hipk2         | homeodomain interacting protein kinase 2                            | NM_010433          | 15258     | 6 B      |
| 1433683_at   | 163                                                | 139                                               | 149                                          | 54                                           | 0.39                          | 1.1683                          | 2.7459                        | 0.9167                        | 0.0001                                                          | 0.1021                                                            | 8E-06                                                         | 0.1521                                                             | Rbm35b        | RNA binding motif protein 35b                                       | BF124648           | 77411     | 8 D3     |
| 1420872_at   | 562                                                | 484                                               | 548                                          | 189                                          | 0.3899                        | 1.1601                          | 2.8996                        | 0.9745                        | 1E-06                                                           | 0.1114                                                            | 3E-08                                                         | 0.7184                                                             | Gucy1b3       | guanylate cyclase 1, soluble, beta 3                                | BF472806           | 54195     | 3 E3     |
| 1423561_at   | 225                                                | 148                                               | 160                                          | 58                                           | 0.3895                        | 1.5204                          | 2.7807                        | 0.7124                        | 9E-05                                                           | 0.004                                                             | 5E-05                                                         | 0.0264                                                             | Nell2         | NEL-like 2 (chicken)                                                | AI838010           | 54003     |          |
| 1451019_at   | 301                                                | 173                                               | 258                                          | 67                                           | 0.3893                        | 1.735                           | 3.8294                        | 0.8593                        | 1E-05                                                           | 0.0021                                                            | 7E-07                                                         | 0.2919                                                             | Ctsf          | cathepsin F                                                         | AK017474           | 56464     | 19 A     |
| 1442051_at   | 947                                                | 540                                               | 696                                          | 210                                          | 0.3887                        | 1.7535                          | 3.3146                        | 0.7347                        | 1E-06                                                           | 1E-07                                                             | 2E-07                                                         | 0.0009                                                             | Hist2h3c1     | histone cluster 2, H3c1                                             | BE691662           | 15077     | 3 F1-F2  |
| 1460314_s_at | 2078                                               | 1144                                              | 1843                                         | 443                                          | 0.3874                        | 1.8175                          | 4.1601                        | 0.8668                        | 1E-07                                                           | 7E-06                                                             | 1E-11                                                         | 0.0212                                                             | Hist2h3c1     | histone cluster 2, H3c1                                             | NM_019469          | 15077     | 3 F1-F2  |
| 1424966_at   | 308                                                | 302                                               | 310                                          | 117                                          | 0.3872                        | 1.0198                          | 2.6515                        | 1.0067                        | 0.0003                                                          | 0.8061                                                            | 9E-05                                                         | 0.9343                                                             | Tmem40        | transmembrane protein 40                                            | BC019416           | 93436     | 6 E3     |
| 1450567_a_at | 1416                                               | 1594                                              | 1566                                         | 617                                          | 0.387                         | 0.8881                          | 2.539                         | 1.1066                        | 1E-06                                                           | 0.255                                                             | 4E-06                                                         | 0.3915                                                             | Col2a1        | collagen, type II, alpha 1                                          | NM_031163          | 12824     | 15 F1    |
| 1425464_at   | 547                                                | 607                                               | 573                                          | 235                                          | 0.3862                        | 0.8997                          | 2.4443                        | 1.0492                        | 2E-07                                                           | 0.2712                                                            | 2E-07                                                         | 0.5954                                                             | Gata6         | GATA binding protein 6                                              | BM214048           | 14465     | 18 A1    |
| 1418365_at   | 1587                                               | 1577                                              | 1673                                         | 609                                          | 0.3859                        | 1.0064                          | 2.7489                        | 1.0541                        | 2E-08                                                           | 0.8797                                                            | 5E-09                                                         | 0.2942                                                             | Ctsh          | cathepsin H                                                         | NM_007801          | 13036     | 9 E3.1   |
| 1439885_at   | 372                                                | 278                                               | 423                                          | 107                                          | 0.3842                        | 1.3394                          | 3.9665                        | 1.1378                        | 2E-06                                                           | 0.0013                                                            | 8E-08                                                         | 0.1555                                                             | Hoxc5         | homeo box C5                                                        | AA051236           | 15424     | 15 F3    |
| 1418318_at   | 4641                                               | 4004                                              | 3987                                         | 1531                                         | 0.3824                        | 1.159                           | 2.6039                        | 0.8591                        | 4E-10                                                           | 0.0067                                                            | 5E-11                                                         | 0.0033                                                             | Rnf128        | ring finger protein 128                                             | AK004847           | 66889     | X F1     |
| 1451440_at   | 191                                                | 123                                               | 117                                          | 47                                           | 0.3822                        | 1.5521                          | 2.4933                        | 0.6139                        | 1E-06                                                           | 0.0073                                                            | 0.0002                                                        | 0.0205                                                             | Chodl         | chondrolectin                                                       | AF311699           | 246048    | 16 C3.2  |
| 1439109_at   | 569                                                | 566                                               | 582                                          | 215                                          | 0.3788                        | 1.0045                          | 2.7151                        | 1.0239                        | 7E-08                                                           | 0.9369                                                            | 2E-08                                                         | 0.6852                                                             | Ccdc68        | coiled-coil domain containing 68                                    | AV378320           | 381175    | 18 E2    |
| 1448182_a_at | 8765                                               | 7252                                              | 7677                                         | 2741                                         | 0.3779                        | 1.2086                          | 2.8011                        | 0.8758                        | 8E-09                                                           | 0.0003                                                            | 4E-09                                                         | 0.0145                                                             | Cd24a         | CD24a antigen                                                       | NM_009846          | 12484     | 10 B2    |
| 1433924_at   | 4396                                               | 3123                                              | 3673                                         | 1170                                         | 0.3745                        | 1.4074                          | 3.14                          | 0.8356                        | 8E-09                                                           | 0.0016                                                            | 1E-09                                                         | 0.0419                                                             |               |                                                                     | BM200248           |           |          |
| 1456229_at   | 720                                                | 577                                               | 690                                          | 216                                          | 0.374                         | 1.2467                          | 3.1961                        | 0.9588                        | 2E-06                                                           | 0.0004                                                            | 3E-07                                                         | 0.5288                                                             | Hoxb3         | homeo box B3                                                        | BG073383           | 15410     | 11 D     |
| 1427760_s_at | 301                                                | 139                                               | 210                                          | 52                                           | 0.3721                        | 2.1692                          | 4.0599                        | 0.6964                        | 0.0002                                                          | 0.0005                                                            | 4E-06                                                         | 0.0249                                                             | Prl2c2        | prolactin family 2, subfamily c, member 2                           | X75557             | 18811     | 13 A1    |
| 1439627_at   | 232                                                | 135                                               | 142                                          | 50                                           | 0.3706                        | 1.7187                          | 2.8433                        | 0.6131                        | 9E-06                                                           | 0.0021                                                            | 3E-05                                                         | 0.0101                                                             | Zic1          | zinc finger protein of the cerebellum 1                             | AV031691           | 22771     | 9 E3.3   |
| 1416023_at   | 2403                                               | 1688                                              | 2049                                         | 616                                          | 0.3648                        | 1.4232                          | 3.3269                        | 0.8527                        | 4E-09                                                           | 6E-06                                                             | 2E-10                                                         | 0.0031                                                             | Fabp3         | fatty acid binding protein 3, muscle and heart                      | NM_010174          | 14077     | 4 D.2    |
| 1424886_at   | 1275                                               | 1122                                              | 1202                                         | 409                                          | 0.3646                        | 1.1369                          | 2.939                         | 0.9426                        | 8E-10                                                           | 0.0021                                                            | 4E-11                                                         | 0.0712                                                             | Ptprd         | protein tyrosine phosphatase, receptor type, D                      | BC025145           | 19266     | 4 C3     |
| 1447845_s_at | 333                                                | 154                                               | 215                                          | 56                                           | 0.3646                        | 2.1571                          | 3.8192                        | 0.6455                        | 2E-06                                                           | 0.0009                                                            | 3E-08                                                         | 0.0124                                                             | Vnn1          | vanin 1                                                             | AV360029           | 22361     | 10 A1-B2 |
| 1451718_at   | 405                                                | 172                                               | 340                                          | 63                                           | 0.3645                        | 2.3549                          | 5.4164                        | 0.8385                        | 0.0021                                                          | 0.0017                                                            | 4E-07                                                         | 0.0556                                                             | Plp1          | proteolipid protein (myelin) 1                                      | BB768495           | 18823     | X F1-F2  |
| 1422168_a_at | 2927                                               | 2483                                              | 2523                                         | 905                                          | 0.3643                        | 1.1784                          | 2.7879                        | 0.8619                        | 4E-09                                                           | 0.0029                                                            | 2E-09                                                         | 0.0093                                                             | Bdnf          | brain derived neurotrophic factor                                   | AY057913           | 12064     | 2 E3     |
| 1419675_at   | 4026                                               | 4006                                              | 4689                                         | 1450                                         | 0.3619                        | 1.005                           | 3.234                         | 1.1647                        | 2E-08                                                           | 0.9273                                                            | 6E-10                                                         | 0.0105                                                             | Ngf           | nerve growth factor                                                 | NM_013609          | 18049     | 3 F.2    |
| 1451999_at   | 226                                                | 207                                               | 215                                          | 75                                           | 0.3611                        | 1.0963                          | 2.8801                        | 0.9486                        | 5E-05                                                           | 0.3111                                                            | 3E-05                                                         | 0.6325                                                             | Ldb3          | LIM domain binding 3                                                | AF114378           | 24131     | 14 B     |
| 1418367_x_at | 1728                                               | 892                                               | 1332                                         | 322                                          | 0.3609                        | 1.9367                          | 4.1362                        | 0.7708                        | 2E-05                                                           | 3E-05                                                             | 3E-07                                                         | 0.0142                                                             | Hist2h2aa1    | histone cluster 2, H2aa1                                            | BC010564           | 15267     | 3 F1-F2  |
| 1458482_at   | 236                                                | 209                                               | 222                                          | 75                                           | 0.3596                        | 1.1315                          | 2.9577                        | 0.9399                        | 5E-06                                                           | 0.0586                                                            | 2E-06                                                         | 0.4439                                                             | Tnni3k        | TNNI3 interacting kinase                                            | BB480482           | 435766    | 3 H4     |
| 1448595_a_at | 3461                                               | 850                                               | 982                                          | 305                                          | 0.3587                        | 4.0696                          | 3.2185                        | 0.2837                        | 5E-08                                                           | 4E-06                                                             | 3E-09                                                         | 2E-06                                                              | Bex1          | brain expressed gene 1                                              | NM_009052          | 19716     | X F1     |
| 1448269_a_at | 1721                                               | 1096                                              | 1263                                         | 393                                          | 0.3582                        | 1.5704                          | 3.2165                        | 0.7337                        | 4E-08                                                           | 8E-09                                                             | 2E-07                                                         | 0.0024                                                             | Klhl13        | kelch-like 13 (Drosophila)                                          | NM_026167          | 67455     | X A2     |
| 1446524_at   | 297                                                | 200                                               | 235                                          | 71                                           | 0.3564                        | 1.4819                          | 3.2909                        | 0.7914                        | 3E-05                                                           | 0.0006                                                            | 3E-05                                                         | 0.1109                                                             |               |                                                                     | BB396283           |           |          |
| 1420940_x_at | 258                                                | 173                                               | 192                                          | 62                                           | 0.3561                        | 1.492                           | 3.119                         | 0.7444                        | 2E-06                                                           | 0.0225                                                            | 4E-08                                                         | 0.0428                                                             | Rgs5          | regulator of G-protein signaling 5                                  | BF585144           | 19737     | 1 H2     |
| 1434780_at   | 170                                                | 166                                               | 142                                          | 59                                           | 0.3551                        | 1.0234                          | 2.4121                        | 0.837                         | 6E-05                                                           | 0.7869                                                            | 0.0001                                                        | 0.0801                                                             | C130038G02Rik | RIKEN cDNA C130038G02 gene                                          | AU067634           | 77521     | 5 G3     |
| 1449153_at   | 1001                                               | 602                                               | 566                                          | 213                                          | 0.3549                        | 1.6634                          | 2.6537                        | 0.5661                        | 4E-06                                                           | 8E-05                                                             | 3E-06                                                         | 4E-05                                                              | Mmp12         | matrix metalloproteinase 12                                         | BC019135           | 17381     | 9 A1     |
| 1433919_at   | 115                                                | 108                                               | 100                                          | 38                                           | 0.3536                        | 1.0675                          | 2.6318                        | 0.8718                        | 8E-05                                                           | 0.2553                                                            | 4E-05                                                         | 0.0182                                                             | Asb4          | ankyrin repeat and SOCS box-containing 4                            | AV302111           | 65255     | 6 A1     |
| 1444650_at   | 126                                                | 100                                               | 102                                          | 35                                           | 0.3475                        | 1.2601                          | 2.9403                        | 0.8108                        | 0.0073                                                          | 0.223                                                             | 0.0019                                                        | 0.1252                                                             | Arhgef18      | rho/rac guanine nucleotide exchange factor (GEF) 18                 | BF151040           | 102098    | 8 A1.1   |
| 1450171_x_at | 405                                                | 183                                               | 259                                          | 64                                           | 0.347                         | 2.2096                          | 4.0642                        | 0.6382                        | 5E-05                                                           | 2E-06                                                             | 9E-05                                                         | 0.039                                                              | Gzme          | granzyme E                                                          | NM_010373          | 14942     | 14 C3    |
| 1451245_at   | 286                                                | 157                                               | 201                                          | 54                                           | 0.3457                        | 1.8229                          | 3.9668                        | 0.7011                        | 1E-06                                                           | 3E-05                                                             | 2E-08                                                         | 0.0004                                                             | Lrrc3b        | leucine rich repeat containing 3B                                   | BC019794           | 218763    | 14 A2    |
| 1423477_at   | 1179                                               | 825                                               | 914                                          | 285                                          | 0.3448                        | 1.4283                          | 3.2127                        | 0.7757                        | 8E-09                                                           | 0.0119                                                            | 1E-08                                                         | 0.0499                                                             | Zic1          | zinc finger protein of the cerebellum 1                             | BB361162           | 22771     | 9 E3.3   |
| 1449359_at   | 215                                                | 245                                               | 242                                          | 85                                           | 0.3445                        | 0.8752                          | 2.8599                        | 1.1258                        | 4E-07                                                           | 0.2703                                                            | 4E-07                                                         | 0.3211                                                             | Pax1          | paired box gene 1                                                   | NM_008780          | 18503     | 2 G2     |
| 1428891_at   | 2140                                               | 718                                               | 1188                                         | 247                                          | 0.3437                        | 2.9826                          | 4.8181                        | 0.5552                        | 3E-06                                                           | 7E-05                                                             | 1E-06                                                         | 0.0096                                                             | 9130213B05Rik | RIKEN cDNA 9130213B05 gene                                          | AK008716           | 231440    | 5 E2     |
| 1423506_a_at | 1018                                               | 445                                               | 706                                          | 152                                          | 0.342                         | 2.2867                          | 4.6366                        | 0.6934                        | 1E-07                                                           | 0.0002                                                            | 7E-12                                                         | 0.0099                                                             | Nnat          | neuronatin                                                          | AV218841           | 18111     | 2 H1     |
| 1418933_at   | 1271                                               | 1287                                              | 1316                                         | 440                                          | 0.3418                        | 0.9879                          | 2.9926                        | 1.0355                        | 6E-06                                                           | 0.8182                                                            | 7E-07                                                         | 0.398                                                              | Slc1a6        | solute carrier family 1 (high affinity aspartate/glutamate transpor | NM_009200          | 20513     | 10 C1    |
| 1421594_a_at | 940                                                | 701                                               | 730                                          | 239                                          | 0.3411                        | 1.341                           | 3.0504                        | 0.7759                        | 3E-07                                                           | 0.0027                                                            | 3E-08                                                         | 0.0031                                                             | Sytl2         | synaptotagmin-like 2                                                | NM_031394          | 83671     | 7 E1     |
| 1450303_at   | 103                                                | 125                                               | 130                                          | 42                                           | 0.3375                        | 0.8309                          | 3.0885                        | 1.2544                        | 0.0006                                                          | 0.5046                                                            | 0.0002                                                        | 0.3777                                                             | Vax2          | ventral anterior homeobox containing gene 2                         | NM_011912          | 24113     | 6 C3     |

Table S1 - M vs F (WT)



| Probe Set ID | Female Cd82-/- average signal | Female Cd82+/+ average signal | Male Cd82-/- average signal | Male Cd82+/+ average signal | Male Cd82+/+ Ratio | Female Cd82-/- Ratio | Male Cd82+/+ Ratio | Female Cd82-/- Ratio | p-value Male Cd82+/+ vs Female Cd82+/+ | p-value Male Cd82+/+ vs Male Cd82-/- | p-value Female Cd82-/- vs Male Cd82-/- | Gene  | Description                                                        | GB        | Entrez Id | Cytoband |
|--------------|-------------------------------|-------------------------------|-----------------------------|-----------------------------|--------------------|----------------------|--------------------|----------------------|----------------------------------------|--------------------------------------|----------------------------------------|-------|--------------------------------------------------------------------|-----------|-----------|----------|
| 1420942_s_at | 271                           | 148                           | 171                         | 17                          | 0.1186             | 1.8372               | 9.7849             | 0.6317               | 0.0008                                 | 0.0094                               | 0.0002                                 | Rgs5  | regulator of G-protein signaling 5                                 | BF585144  | 19737     | 1 H2     |
| 1418105_at   | 344                           | 251                           | 278                         | 22                          | 0.088              | 1.3722               | 12.612             | 0.8084               | 0.0013                                 | 0.0015                               | 0.0003                                 | Stmn4 | stathmin-like 4                                                    | NM_019675 | 56471     | 14 D1    |
| 1449499_at   | 245                           | 232                           | 270                         | 16                          | 0.0706             | 1.0549               | 16.514             | 1.1054               | 3E-08                                  | 0.5373                               | 2E-09                                  | Hoxa7 | homeo box A7                                                       | NM_010455 | 15404     | 6 B3     |
| 1425672_a_at | 97                            | 101                           | 15                          | 3                           | 0.0306             | 0.9622               | 4.7105             | 0.15                 | 2E-08                                  | 0.8527                               | 0.0911                                 | Trpc2 | transient receptor potential cation channel, subfamily C, member 2 | AF230802  | 22064     | 7 F1     |
| 1436936_s_at | 3887                          | 5799                          | 51                          | 58                          | 0.0101             | 0.6703               | 0.8779             | 0.0132               | 2E-11                                  | 0.0015                               | 0.448                                  | Tsix  | X (inactive)-specific transcript, antisense                        | BG806300  | 22097     | X D      |
| 1427263_at   | 166                           | 224                           | 6                           | 2                           | 0.0081             | 0.7391               | 3.41               | 0.0374               | 1E-07                                  | 0.0115                               | 0.042                                  | Xist  | inactive X specific transcripts                                    | L04961    | 213742    | X D      |
| 1427262_at   | 766                           | 1046                          | 8                           | 6                           | 0.006              | 0.7325               | 1.2991             | 0.0107               | 9E-07                                  | 0.0434                               | 0.6224                                 | Xist  | inactive X specific transcripts                                    | L04961    | 213742    | X D      |

Table S1 - M vs F (WT)
